**Title: Proapoptotic RHG genes and mitochondria play a key non-apoptotic role in remodelling the *Drosophila* sensory system**

**Authors:** Amrita Mukherjee<sup>1,2</sup>, Sinziana Pop<sup>1,3</sup>, Shu Kondo<sup>4</sup> and Darren W Williams<sup>1\*</sup>

<sup>1</sup> Centre for Developmental Neurobiology, King's College London, London, SE1 1UL, UK

<sup>2</sup> Medical Research Council Toxicology Unit, School of Biological Sciences, University of Cambridge, Cambridge, CB2 1QR, UK

<sup>3</sup> The Francis Crick Institute, 1 Midland Road, London, NW1 1AT, UK

<sup>4</sup> Laboratory of Invertebrate Genetics, National Institute of Genetics, 1111 Yata, Mishima, Shizuoka, Japan \*Correspondence: [darren.williams@kcl.ac.uk](mailto:darren.williams@kcl.ac.uk)

Running title: Caspases and mitochondria in pruning

Key words: *Drosophila*, caspases, non-apoptotic, mitochondria, pruning, sensory neurons, cell death, remodelling

1 **Abstract**

2 Caspases are best known for their role in programmed cell death but have also been found  
3 to be important in several non-apoptotic phenomena such as cell fate specification, cell  
4 migration and terminal differentiation. The dynamics of such sub-lethal caspase events and  
5 the molecular mechanisms regulating them are still largely unknown. As more tools for  
6 visualizing and manipulating caspase activation *in vivo* become available, greater insights  
7 into this biology are being made. Using a new and sensitive *in vivo* effector caspase probe,  
8 called SR4VH, we demonstrate that effector caspases are activated in pruning sensory  
9 neurons earlier than previously thought and that the level of caspase activation in these  
10 neurons is consistently lower than in neurons undergoing cell death. We reveal that Grim and  
11 Reaper, two of the four pro-apoptotic RHG proteins, are required for sensory neuron pruning  
12 and that disrupting the dynamics of the mitochondrial network prevents effector caspase  
13 activation in both pruning and dying sensory neurons. Overall, our findings demonstrate that  
14 a sublethal deployment of the ‘apoptotic machinery’ is critical for remodelling dendrites and  
15 also reveal a direct link between mitochondria and sensory neuron cell death *in vivo*.

16

17

18

19

20

21

22

23

24

25

## 26 **Introduction**

27 Cysteine aspartate-specific proteases (Caspases) are key mediators of programmed cell death  
28 by apoptosis. Apoptosis is a universal mode of cellular destruction in metazoans and is  
29 critical for the development of tissue architecture and organ systems (1). Whilst the  
30 elimination of whole cells is important for sculpting tissues, it has become clear that caspases  
31 also play non-apoptotic roles including cell fate specification, migration and terminal  
32 differentiation of cell shape/function (2). In the nervous system, apoptosis plays a significant  
33 role in network construction, where as many as 50% of the neurons generated are removed  
34 (3). Caspases are also known to function non-apoptotically, during the refinement of neuronal  
35 arborizations and during synaptic plasticity (4) (5). Insects undergoing complete  
36 metamorphosis have long been a powerful *in vivo* model for studying regressive  
37 developmental phenomena (6,7). The nervous systems of such metamorphic insects are  
38 dramatically reshaped during the transition between larval and adult forms by the removal of  
39 redundant larval neurons and by the repurposing of neurons that survive, prune and then  
40 regrow to generate *de novo* adult-specific arborizations (8). Our previous work and that of  
41 others have shown that caspases are important during the remodelling of the sensory nervous  
42 system where they are activated in dying neurons and within the dendritic branches that are  
43 removed during pruning (9,10). In mammals, caspases and inhibitors of apoptosis have been  
44 shown to be critical for trophic factor mediated axon fragmentation, in both sensory and  
45 sympathetic neurons (11-13) (for review see (14)).

46 In mammals, we know that caspase activation during cell death can be initiated by  
47 one of two pathways: the ‘intrinsic’ mitochondrial pathway and the ‘extrinsic’ cell death  
48 receptor pathway. The majority of studies in neurons have focused on the intrinsic  
49 ‘mitochondrial’ pathway where caspases are present in cells as proenzymes and are activated  
50 in a hierarchical manner. In mammalian cells, cytochrome c, released from the inner

51 mitochondrial membrane, forms a complex with Apaf-1 and an initiator caspase, Caspase-9,  
52 which then allows the self-activation of Caspase-9. Active Caspase-9 then cleaves and  
53 activates effector caspases including Caspase-3, which in turn targets a large number of  
54 cellular proteins (see (15,16) for reviews). The release of cytochrome c is essential in  
55 mammals but appears to be dispensable for the formation of the apoptosome and cell death in  
56 *Drosophila* (17). In flies, the initiator caspase DRONC is activated by the Apaf1 homolog,  
57 Ark (18), which then cleaves the effector caspases Drice and Dcp-1. These are ultimately  
58 responsible for executing almost all of developmental cell death in flies (19). Key  
59 proapoptotic regulators in flies are Reaper, Hid, Grim and Sickie. These ‘RHG proteins’  
60 remove the inhibitor of apoptosis proteins (IAP) which normally bind to and degrade  
61 DRONC (for review see (20)). These IAP antagonists, have analogues in mammals,  
62 Smac/Diablo and Omi/Htr2A, which are intimately associated with mitochondria (21) (22).  
63 When RHG proteins are expressed in mammalian or *Drosophila* cells, they localise to the  
64 mitochondria and this is required for their pro-apoptotic function (23-26). Mitochondrial  
65 localisation of Reaper, Grim and Sickie depends on the presence of a GH3 domain (24,26)  
66 whereas Hid requires a mitochondrial target sequence and the Cyclin-dependent kinase 7  
67 (Cdk7) protein (27,28). To localise to mitochondrial membrane, Reaper can either interact  
68 directly with the lipids in the outer mitochondrial membrane via its GH3 domain (29) or form  
69 a multimeric complex with Hid (30) that contributes to autoubiquitination and degradation of  
70 DIAPs (29). Although DRONC and Drice also localise to the mitochondria in cultured  
71 *Drosophila* cells (31), where caspases localise *in vivo* within *Drosophila* neurons, is still an  
72 open question.

73         Although the role of the involvement of cytochrome c and an intrinsic pathway of  
74 caspase activation in *Drosophila* has remained controversial there is a growing body of  
75 evidence to suggest that mitochondria play a key role in caspase activation in dying cells

76 (17). Mitochondria act as critical nodes for signal integration within cells, with their structure  
77 and dynamics also being directly related to caspase activation (32,33), but whether they play  
78 a role in non-apoptotic caspase function is largely unexplored.

79 In this paper we reveal the dynamics of caspases activation and the role of  
80 mitochondria in the restructuring of the sensory nervous system during *Drosophila*  
81 metamorphosis. We show that effector caspases are activated much earlier than previously  
82 known in the dorsal dendritic arborization C (ddaC) neurons as they undergo dendrite  
83 pruning during metamorphosis. We also find that caspase activation is at a substantially  
84 lower level in these pruning neurons than in dendritic arborisation (da) neurons that die. We  
85 reveal that two of the proapoptotic RHG genes, Grim and Reaper, are required for sensory  
86 neuron pruning and show that mitochondria play a key role in dendrite remodelling. We also  
87 uncover a direct link between mitochondrial function and caspase activation during neuronal  
88 cell death in sensory neurons in *Drosophila*.

89

## 90 **Materials and Methods**

### 91 **Fly stocks**

92 The following fly lines were used: *UAS-CD8::PARP::Venus* (10), *UAS-Mito::GFP* (BL  
93 8442), *ppk-GAL1.9* (expressed in Class IV neuron (34)), *ppk-GAL4* (BL32078 and BL32079)  
94 (expressed in class IV and class III neurons), *19-12GAL4 UAS-CD8::GFP* (35), *UAS-RHG*  
95 *miRNA* (36), *UAS-TFAM* (37), *UAS-Mito::XhoI* (38), *UAS-Milton RNAi* (BL44477), *UAS-*  
96 *Miro RNAi* (BL51646), *UAS-Marf RNAi* (BL 55189), *UAS-Opal like RNAi* (BL32358), *UAS-*  
97 *Drp1 RNAi* (BL27682), *UAS-Dicer2* (BL 24648), *H99* deficiency (BL 1576), *XR38*  
98 deficiency (BL 83151), *rpr<sup>SK3</sup>/TM6B* (This study), *hid<sup>SK6</sup>/TM6B* (This study), *grim<sup>A6C</sup>*  
99 (BL32061), *UAS-Drp1WT* (39), *elav-GAL4<sup>C155</sup>* (BL 458), *UAS-RedStinger* (BL 8545), *SOP-*  
100 *FLP* on X (a gift from Tadashi Uemura), *nSyb-GAL4* (BL51635), *UAS-SR4VH* (40). For

101 generating the modified mosaic clones with a repressible cell marker (MARCM) experiment  
102 for *H99*, similar procedures were followed as described previously(41).

### 103 **Immunohistochemistry and imaging**

104 Larvae and pre-pupae were dissected as described previously (42). The fillet preps  
105 were fixed in freshly prepared 4% formaldehyde for 20 minutes at room temperature. The  
106 fixative was washed off with PBST (0.3% TritonX-100). The preps were then blocked in 5%  
107 BSA in PBST for 1h at room temperature and incubated in appropriate mix of primary  
108 antibodies overnight at 4°C. The primary antibody solution was washed off the next day and  
109 samples incubated in secondary antibody solution overnight at 4°C. After washing in PBST  
110 and then PBS the following day, the fillet preps were mounted on poly-L-lysine coated  
111 coverslips. The samples were serially dehydrated through an ethanol series, washed twice in  
112 xylene and mounted in DPX.

113 The following primary antibodies were used: Mouse anti-GFP (1:400, Abcam),  
114 Rabbit anti-PARP (1:500, Abcam ab2317), Mouse anti-EcR (1:5, DSHB), Guinea pig anti-  
115 Sox14 (1:500, gift from Fengwei Yu), Rabbit anti Dcp-1 cleaved (1:100, Cell Signalling). All  
116 secondary antibodies were used at 1:500 dilutions, obtained from Jackson Laboratories.

117 For live imaging the pre-pupae were mounted under a coverslip on a standard glass  
118 slide. A very small amount of Halocarbon oil (Voltalef) was added to the contact point  
119 between the sample and the coverslip and pressed down lightly onto four small 2 mm balls of  
120 dental wax to act as spacers. This preparation was then imaged immediately on the  
121 microscope. In order to image pupae, white pre-pupae were selected and aged at 25°C for the  
122 required duration in a humid chamber and dissected out of the pupal case before mounting in  
123 the same way as pre-pupae. We used Zeiss LSM 510 or LSM 800 and Plan-Apochromat  
124 40x/1.3 objective for imaging and the Olympus FV3000 scanning inverted confocal system  
125 run by FV-OSR software using a 60X 1.4NA silicon immersion lens (UPLSAPO60xSilcon).

126 To obtain intensity measurements of neurons expressing SR4VH we used Line plots;  
127 the Plot Profile tool in Fiji was used to extract raw fluorescence intensity values for the RFP  
128 and Venus channels. The values were then imported into MATLAB (R2018a, MathWorks)  
129 and normalised by dividing all fluorescence intensity values to the maximum value for the  
130 RFP channel encountered along each Line at each timepoint such that all fluorescence  
131 intensity along Line plots have a common scale from 0 to 1, with 1 being the highest value  
132 encountered in the RFP channel along that Line and at that timepoint.

133 Dying SR4VH cells in the wing pouch were counted from one optical slice taken  
134 from the middle of the Z-stack and analysed using the Kruskal-Wallis test to compare mean  
135 ranks, as the data failed to meet the normality and homogeneity of variances assumptions of  
136 one-way ANOVA. Statistically significant findings were followed up with pairwise Mann-  
137 Whitney tests, with p values adjusted using a Bonferroni correction (p values were multiplied  
138 by the total number of pairwise tests performed for each multiple comparison).

139 To measure the number of mitochondria, we used ImageJ Multi-point tool to count  
140 the number of mitochondria and ImageJ segmented line tool to measure the total length of  
141 dendrites and calculated the number of mitochondria per 100 microns of dendrite length. To  
142 compare several genotypes to control, we performed the Kruskal-Wallis test followed by  
143 Dunn's test, with p values adjusted using a Bonferroni correction.

144 We used ordinary one-way ANOVA for statistical significance. For analysing pruning  
145 phenotypes, we divided the phenotypes in three categories: firstly- no phenotype, these  
146 appear like wildtype i.e. field imaged is completely clear of dendrites; second - clearance  
147 defect, where the main dendrites are separated from the cell body but not cleared from field;  
148 third, severing plus clearance defects, where the primary dendrites remained attached to the  
149 cell body and cut dendrites in the vicinity are not cleared. For each genotype we imaged 2 – 3  
150 abdominal neurons per animal. N numbers represent total number of neurons imaged.

## 151 **CRISPR mutagenesis**

152 New null alleles of *rpr* and *hid* were generated using the transgenic CRISPR system as  
153 described (43). The target-specific 20-bp sequences of the gRNAs are as follows: *rpr*:  
154 GGCATTCTACATACCCGATC, *hid*: TGAACTCGACGCTACGTCAT. We screened  
155 candidate mutant lines by Sanger sequencing and selected those that carry a frameshift-causing  
156 indel mutation in the respective genes. The molecular lesions of the new alleles are as follows:  
157 *rpr*<sup>SK3</sup>: CTACATACCC-ATCAGGCGAC, *hid*<sup>SK6</sup>: GCGCCGATGA-----GTTTCATCGGG,  
158 where deleted bases are indicated as dashes.

159

## 160 **Results**

### 161 **Visualizing caspase activation within sensory neurons at the onset of metamorphosis.**

162 The larval sensory system of *Drosophila melanogaster* has bilateral, segmentally repeated  
163 clusters of neurons within the dorsal abdominal body wall. Each of these clusters contain  
164 thirteen sensory neurons, that are uniquely identifiable, six of these neurons are dendritic  
165 arborisation (da) sensory neurons which have characteristic tree-like, peripheral arborisations  
166 (44) (Fig.1A-C). In insects, like other arthropods, the cell bodies of sensory neurons are located  
167 in the periphery and axons from them track through peripheral nerves to terminate in the central  
168 nervous system (CNS). (Fig. 1A)

169 At the beginning of metamorphosis, three of the da neurons in the dorsal cluster, ddaA,  
170 ddaF and ddaB, undergo programmed cell death (Fig.1C and D, images only refer to dying  
171 neurons ddaA and ddaF, asterisks) whereas the other three, ddaD, ddaE and ddaC, survive and  
172 are remodelled (Fig. 1 C and D, ddaC indicated by arrow) (45,46). At the onset of  
173 metamorphosis da neurons remove their larval-specific dendrites by pruning (45), migrate up  
174 the body wall and then elaborate *de novo* adult-specific arborizations (47-49).



175           At pupariation the dorsal cluster of neurons can be easily observed through the dorsal  
176 puparial case (Fig. 1B). By 2h after puparium formation (APF) the cell bodies and proximal  
177 dendrites of the dying neurons, ddaA and ddaF, show clear signs of disintegration (Fig.1D,  
178 asterisks). By 6h APF their cell bodies appear condensed and their dendrites have fragmented,  
179 both features being characteristic of apoptotic cells. The dendritic fragments and dying  
180 condensed cell bodies are rapidly cleared by macrophages (45). The pruning neuron, a class  
181 IV da called ddaC, shows morphological changes by 6h APF (Fig.1D, arrow) with its proximal  
182 dendrites beginning to thin and generate varicosities along the length (Fig.1D). This period of  
183 thinning and beading is quickly followed by branch severing events, after which detached  
184 dendrites undergo fragmentation and are engulfed by macrophages and epidermal cells in the  
185 vicinity (45) (50).

186           Our previous work using the genetically encoded effector caspase reporter,  
187 CD8::PARP::Venus, revealed that caspases are activated within ddaC neurons during pruning  
188 but only in dendritic branches after they had been cut from the cell body (10). To explore the  
189 timing of the onset of caspase activity we used an antibody that recognises the cleaved form of  
190 Dcp-1 and Drice (51). Because Dcp-1 and Drice are direct substrates of DRONC, this antibody  
191 should be able to detect caspase activation prior to the cleavage of the CD8::PARP::Venus  
192 reporter by active effector caspases. Looking at the doomed/dying neurons ddaF and ddaA, we  
193 saw that Dcp-1/Drice are robustly cleaved within each cell, with strong nuclear staining and a  
194 weaker cytoplasmic staining (Fig.1E&F). In the pruning neuron ddaC, we found a low level of  
195 staining for cleaved Dcp-1/Drice in the cell body and also within the intact proximal branches  
196 of ddaC at 6.5h APF (Fig.1 G&H, arrow). The cleaved Dcp-1/Drice immunoreactivity within  
197 the dying da sensory neuron always appeared stronger (Fig.1 E&F) than in ddaC, the pruning  
198 neuron (asterisks indicates dying sensory neurons beside the ddaC neuron Fig 1 G,H). These

199 data, in contrast to our previous findings, indicate that caspases are active in pruning ddaC  
200 neurons early in pupariation, before dendrite branch severing has taken place. (Fig.1 H).

201

202 **SR4VH a genetically encoded probe for visualising sublethal levels of effector caspase**  
203 **activation**

204 It could be that there is no effector caspase activity in pruning neurons at this earlier time  
205 point as a number of studies looking at non-apoptotic developmental events, e.g arista  
206 morphogenesis (52) and border cell migration (53), found that only initiator caspase  
207 (DRONC) activity is required. Encouraged by our initial observations with the DCP1  
208 stainings (Fig. 1) and to interrogate this idea further, we utilized our newly developed  
209 genetically encoded probe to gain further insight into the timing of effector caspase activity  
210 and how this relates to changes in the structure of the dendrites of pruning neurons. We have  
211 previously demonstrated SR4VH to be sensitive and capable of detecting the temporal details  
212 of caspase activity in newly born postembryonic neurons that undergo hemilineage-specific  
213 patterns of cell death (40). The probe has an mRFP1 red fluorescent protein fused together  
214 with the Src64B myristoylation signal and a Venus fluorescent protein with a histone H2B  
215 nuclear localisation signal (Venus::H2B). These two fluorescent domains are joined by a  
216 linker containing four repeats of the DEVD sequence, an optimal effector caspase cleavage  
217 site shown to be effectively cleaved by the fly effector caspases, Drice and Dcp-1 (54). We  
218 call this new probe ‘*SR4VH*’ because of its structure (*SRC::RFP::4xDEV D::Venus::H2B*)  
219 (Fig.2A). Although similar in design to the previously published *Apoliner* probe (55),  
220 SR4VH is different in that it contains four tandem DEVD sequences, not just the single  
221 caspase cleavage site from DIAP1, to improve its cleavage efficiency. It also uses a different  
222 localisation signal to tether the reporter to the membrane compartment (40). With *Apoliner*  
223 we found that large amounts of newly generated reporter protein accumulate in the Golgi

224 apparatus within the cell bodies of the sensory neurons, often obscuring the nuclear signal  
225 (Supplemental Fig. 1 C, D).

226 To validate the SR4VH reporter we imaged it within the developing wing imaginal  
227 discs, a tissue where sporadic developmental apoptosis has been well characterised (56). When  
228 expressing SR4VH in the posterior compartment of wildtype wing discs, we found small  
229 clusters of cells with clear nuclear localised Venus (Fig.2B, yellow arrows). We tested the  
230 status of activated effector caspases by using the cleaved Dcp-1 antibody within these clusters  
231 and found nuclear localised Venus expressing cells colocalised with Dcp-1 immunoreactivity.  
232 The cleaved Dcp-1 signal within these cells independently confirms that the clusters with  
233 nuclear localised Venus have active caspases and are undergoing apoptosis (Supp. Fig.1A).

234 To determine whether SR4VH could report on a rapid induction of cell death we  
235 activated the apoptotic pathway by driving the expression of the proapoptotic gene *head*  
236 *involution defective* (*hid*). Using a heat shock promoter based *hid* construct (*hs-hid*) on the Y  
237 chromosome, we shifted larvae to 37°C for 1 hour then fixed, processed and imaged the tissue  
238 (Fig.2B). After an hour incubation at 37°C, we found a significantly higher number of cells  
239 with nuclear localised Venus in *hs-hid* males, compared with the same genotype kept at 22°C  
240 and also compared to heat-treated females, that do not carry the *hs-hid* transgene. Although our  
241 heat shock treatment may have had a small effect i.e. a few additional cells are dying in Control  
242 females (heat shocked but not carrying the *hs-hid* Y chromosome) than Control males (not heat  
243 shocked carrying the Y *hs-hid* chromosome), the numbers of cells dying as reported by SR4VH  
244 expression were far greater in the heat shocked males carrying the *hs-hid* gene than either type  
245 of Controls (Fig.2B&C). We see that when SR4VH is cleaved, the Venus fragment  
246 accumulates in the nucleus. These data reveal that SR4VH can be used to accurately report on  
247 both normally occurring apoptotic deaths in developing imaginal discs and also when the  
248 apoptotic pathway is rapidly induced experimentally within the same tissue.

249 To see how SR4VH reports on apoptosis within the central nervous system (CNS), we  
250 imaged it before and after the onset of metamorphosis. When expressing SR4VH under the  
251 control of *nSyb-GAL4*, the neural synaptobrevin driver, we found the cell membranes of fully  
252 differentiated neurons were evenly labelled and they showed no cleavage of the probe  
253 throughout larval life (Fig.2D). We then looked at this same genotype four hours after the onset  
254 of metamorphosis (Fig.2E) and found a large number of neuronal cell bodies, with nuclear  
255 localised Venus (compare Fig.2D&E). These cell deaths occur throughout the nervous system  
256 but the largest number of neurons with nuclear Venus signals occur in the abdominal  
257 neuromeres (the region that undergoes the most dramatic remodelling at metamorphosis).  
258 These cells with nuclear Venus at 4h APF are among the class of neurons that are known to  
259 undergo hormonally-gated programmed cell death (8,57).

260

### 261 **Using SR4VH to visualise effector caspase activity live, in single neurons**

262 To obtain insights into the detailed timing of caspase activation we wanted to monitor the  
263 dynamics of caspase activation ‘live’ in single cells, in intact animals. We initially focused on  
264 imaging SR4VH in the dorsal multiple dendrite neuron 1 (dmd1) in pre-pupae as it is easily  
265 identifiable, its cell body and neurites show strong immunoreactivity for cleaved Dcp-1/Drice  
266 (data not shown) and is known to be rapidly removed during early metamorphosis. We imaged  
267 dmd1 once every 10 mins through the puparial case starting from 2h APF (Fig. 2F and Supp  
268 movie 1). We saw the accumulation of Venus in the nucleus over a span of 30 minutes.  
269 Measurements of the separate Venus and RFP channels reveal the progression of the Venus  
270 marker from being in the same compartments to being spatially separated. This demonstrates  
271 that the SR4VH probe can directly report on the dynamics of effector caspase function live in  
272 a single neuron undergoing programmed cell death within an intact animal.

273

274 **SR4VH reveals early and low-level effector caspase activation within pruning neurons at**  
275 **the onset of metamorphosis.**

276 To image caspase activation within da neurons at the onset of metamorphosis we used  
277 two copies of pickpocket GAL4 (*ppkGAL4*) and UAS-SR4VH. We used this combination  
278 because it allowed us to cleanly visualise both the ‘doomed’ class III dorsal da neurons (ddaA  
279 and ddaF that die) and the ‘surviving’ class IV da neurons (ddaC that undergoes pruning)  
280 (Fig.3A) simultaneously. In the dying neurons, ddaA and ddaF, we found that within 20  
281 minutes APF there is an indication of nuclear entry of Venus, and by 40 minutes APF clear  
282 nuclear accumulation (Fig.3B and Supp movie 2). This relatively rapid and robust nuclear  
283 localisation of Venus mirrors that seen for *dmd1* above (Fig.2F). From the same time-lapse  
284 sequence we see that the class IV neuron, ddaC, has a lower but sustained accumulation of  
285 Venus within its nucleus from 20 minutes APF (Fig.3C,D). This nuclear entry is prior to any  
286 of the primary dendritic branches being cut (Fig. 3D). We never saw the nuclear entry of Venus  
287 in class III or class IV neurons during larval stages (Supp Fig. 1E,E’). This marks the first time  
288 that we observe a measurable change at these early stages. Previously, using the  
289 CD8::PARP::Venus probe (Fig.3E) in ddaC neurons (10), we observed very low levels of  
290 cleaved PARP (cPARP) but could not ascertain if this was background as it was barely above  
291 the levels of immunoreactivity in third instar ddaC (unpublished observations). In contrast, the  
292 cPARP-IR signal was always high in the severed branches of the pruning neurons detected  
293 between 4 – 8 h APF ((10)and Fig.3G) and in dying neurons (Fig.3F). These data from SR4VH  
294 show that caspase activation occurs very soon after the onset of metamorphosis. In contrast,  
295 we found that *Apoliner*, another published and well characterised live probe (55), did not allow  
296 us to describe these earlier events with clarity (see Supplemental Figure 1C-D).

297 To determine whether the differences in the levels of nuclear localization of Venus,  
298 between different cells were in fact due to differences in levels of caspase activation, we

299 compared the ratios of RFP and Venus fluorescent channels. Using this ratiometric approach  
300 we see that the levels of the cleaved nuclear localised Venus were consistently higher in the  
301 dying neurons than the pruning neurons (Fig. 3B&C). Thus in this sub-lethal non-apoptotic  
302 context of pruning, effector caspases have a lower activity.

303 Our new dual colour live caspase probe (SR4VH) appears to accurately report cell death  
304 and reveals that non-apoptotic activation of effector caspases in pruning da neurons occur very  
305 soon after the onset of metamorphosis. We found a ~5 fold change in nuclear GFP signal in  
306 dying neurons compared to a 1.3 fold change in pruning neurons within the same time period,  
307 and this for the first time, gives us a quantitative readout of caspase activation live. This reveals  
308 that caspase activation is early and low in pruning neurons and occurs prior to any of the  
309 primary dendritic branches being severed (Fig. 3D arrows).

310

### 311 **The proapoptotic proteins Reaper and Grim are required for da neuron pruning**

312 In *Drosophila* a major control point for apoptosis is through the post-translational regulation  
313 of the inhibitor of apoptosis proteins (DIAPs) (58). DIAP binds to both initiator and effector  
314 caspases, ubiquitylates them to target them for destruction, thus preventing apoptosis from  
315 taking place. To counter this inhibition, the proapoptotic RHG proteins (Reaper, Hid, Grim and  
316 Sickie) bind to DIAP and inhibit it. Previous work has shown that an upregulation of DIAP or  
317 a Gain of function DIAP allele in which ubiquitylation cannot take place, results in a disruption  
318 of da neuron pruning (9,10). Whilst the RHG proteins are widely known as key executors of  
319 programmed cell death during development and following DNA damage, it is not known if  
320 they play a role in regulating non-apoptotic, sub-lethal caspase function.

321 To test the requirement of the RHG proteins during pruning, we first blocked their  
322 function by cell autonomously knocking them down using UAS-miRNA transgene that targets  
323 *reaper*, *hid* and *grim* simultaneously (hereafter referred to as UAS-RHG miRNA) (36). By

324 expressing these shRNAs with *ppk-GAL4* we found that pruning in the class IV neuron *ddaC*  
325 was disrupted (Fig. 4A and B).

326 We found that *ddaC* expressing UAS-RHG miRNA showed varying degrees of  
327 disruption, from neurons with their dendrites were completely removed (Fig. 4A), to ones with  
328 clearance defects (intact severed and fragmenting branches), to others with severing defects,  
329 that had intact primary dendrites and portions of their arborizations still attached (Fig. 4B). We  
330 found that the UAS-RHG miRNA suppresses cell death in class III *da* neurons (Supp Figure  
331 2G,H) hence the variability in the pruning phenotype in *ddaC* we observe may be due to *ppk-*  
332 *GAL4* driver not being strong enough to knock down all RHG proteins.

333 To confirm the role of the RHG proteins we looked at pruning in *da* neurons with the  
334 *H99* deficiency chromosome, that removes three of the four RHG genes - *hid*, *grim* and *reaper*.  
335 As *H99* homozygotes are embryonic lethal, we generated single cell mutant clones using a  
336 modified version of the MARCM (Mosaic Analysis with a Repressible Cell Marker) technique  
337 we developed previously (41). This approach allows us to see the morphology of both the single  
338 homozygous mutant clones and heterozygous control neurons side by side, in the same animal.  
339 We found that 90% of Class IV sensory neuron *H99* MARCM clones, where each clone was  
340 obtained in separate individual pupae, demonstrated a strong block in dendrite pruning. By  
341 contrast, 100% of heterozygous, *GAL80*<sup>+</sup> control neurons in neighbouring segments underwent  
342 pruning like wildtype neurons (Fig. 4C-C''' & H).

343 To narrow down which of the RHG genes are required for *da* neuron pruning, we used  
344 the chromosomal deficiency combination of *H99/XR38*. *XR38* removes the whole of the *reaper*  
345 open reading frame, some of the *cis*-regulatory region around *grim*, has a point mutation within  
346 *grim* itself and removes *sickle*. This combination results in a clear blockade of programmed  
347 cell death in the larval and adult nervous system (59). We found that this combination blocked  
348 dendrite pruning in *ddaC* neurons resulting in a range of phenotypes from robust branch



349 severing to branch clearance (Fig. 4D and 4D'). In 100% of the cases we observed that pruning  
350 was disrupted, this included both branch clearance and dendrite severing phenotypes.

351       Following this, we then tested individual alleles of *reaper* (*rpr<sup>SK3</sup>*), *hid* (*hid<sup>SK6</sup>*) and  
352 *grim* (*grim<sup>A6C</sup>*) mutants over the *H99* deficiency. With these we found that loss of both *reaper*  
353 and *grim* resulted in a disruption of pruning but, to our surprise, *hid* did not result in any  
354 suppression of branch severing and clearance was disrupted only in a small number of cases,  
355 with small fragments of dendrite remaining (Fig. 4 E – H). Since the *H99* MARCM clones,  
356 with disrupted *hid*, *grim* and *reaper* (but not *sickle*), showed very strong pruning defects with  
357 a block in dendrite severing in 90% of the cases, we chose not to investigate the role of *sickle*  
358 further, although, it is still possible that *sickle* plays a minor role in the pruning of these  
359 neurons. Out of the three RHG genes in the H99 region we found that the loss of Reaper or  
360 Grim alone resulted in weaker pruning defects than when both are removed (Fig. 4). Taken  
361 together these data suggest that Reaper and Grim play a non-apoptotic role in da neuron  
362 pruning.

363

### 364 **Mitochondrial physiology and transport are important for da neuron pruning**

365 Because Reaper and Grim both have GH3 domains and are thought to interact with and  
366 degrade IAPs when localised to the mitochondria (24,26,29,30) we wanted to establish whether  
367 mitochondria play a role during the remodelling of larval sensory neurons.

368       To determine the requirement of mitochondria during pruning we disrupted different  
369 aspects of mitochondrial biology in single remodelling neurons. It has previously been shown  
370 that overexpression of the *Drosophila* mitochondrial transcription factor A (TFAM),  
371 dysregulates mtDNA-encoded gene expression (37). TFAM normally binds mitochondrial  
372 DNA (mtDNA) and when overexpressed in ddaC neurons, we found that dendrite pruning is  
373 disrupted. TFAM prevents both dendritic branch severing and clearance from taking place



374 normally (Fig. 5A, B and J). As an alternative method to directly inhibit mitochondrial gene  
375 expression we expressed a mitochondrially targeted restriction enzyme MitoXhoI which is  
376 transported into mitochondria, where it cuts at a single site in the mitochondrial genome  
377 (cytochrome c oxidase subunit I) (38). We see that in *ddaC* neurons, expressing MitoXhoI,  
378 branch severing and clearance are significantly disrupted. (Fig. 5A, C and J). As these branch  
379 severing phenotypes resembled those seen when Ecdysone signalling is disrupted during  
380 pruning (45), we used known downstream markers to determine if there was a global impact  
381 on hormonally-gated development. We found no change in the timing or levels of EcR or  
382 Sox14 expression in these genotypes. (Supp Fig. 2A,B)

383 Mitochondrial transport is important in all cells but particularly so in neurons which  
384 have compartments distant from the cell body and have a high energy demand to fulfil (60).  
385 To determine if changing the transport and subsequent localization of mitochondria disrupts  
386 pruning, we cell-autonomously downregulated Milton, an adaptor protein, or overexpressed  
387 Miro, a critical GTPase required for transport. Both proteins have previously been shown to  
388 be necessary for mitochondrial transport along *Drosophila* motoneuron axons (61,62).  
389 Disrupting either Milton or Miro resulted in a consistent block of severing and branch  
390 clearance during dendrite pruning in *ddaC* neurons, similar to that seen with TFAM or  
391 MitoXhoI overexpression (Fig. 5D, E and J, Supp 1). Furthermore, we also found that this  
392 disruption of mitochondrial transport did not result in a change in Ecdysone signalling, which  
393 showed a normal onset (Fig. Supp 2 C,D).

394 In addition to being distributed throughout neuronal compartments via intracellular  
395 transport, the mitochondrial network is known to be highly dynamic, capable of rapid  
396 transformations in size and shape, through a balance of fission and fusion mechanisms (for  
397 review check (63)). Proper fission/fusion dynamics is also important for optimal distribution  
398 of mitochondria in the distant neuronal compartments (64,65). In majority of cell types in

399 *Drosophila*, GTPases Marf and Opa1 are required for fusion of the outer and inner  
400 mitochondrial membrane respectively while the GTPase Drp1 regulates fission (66). Here we  
401 found that dysregulation of both fission and fusion machinery in *ddaC* neurons resulted in  
402 disruptions to pruning. In all cases, branch clearance was more impacted than branch severing  
403 when compared with other dysregulations of mitochondria (described above). (Fig. 5F-I and  
404 J).

405 To determine if these different perturbations changed the general morphology and  
406 location of the mitochondrial network within pruning neurons, we imaged GFP tagged  
407 mitochondria using Mito::GFP in individual *ddaC*. We found fewer mitochondria per unit  
408 length of dendrite when disrupting mitochondrial function (using MitoXhoI), as well as when  
409 perturbing mitochondrial transport (using Milton RNAi or Miro overexpression), but not  
410 when overexpressing Drp1, which was similar to wildtype neurons. (Fig. 6A-F).

411 As detailed above we have found caspases to be active throughout the early stages of  
412 pruning and we next wanted to know whether they were active locally within the dendrites of  
413 neurons in which we had disrupted mitochondria function. Although SR4VH is excellent for  
414 revealing temporal and quantitative aspects of caspase activation during pruning we used  
415 mCD8::PARP::Venus here as it allows spatial visualisation of active caspases within the  
416 dendrites. Strikingly, we observed no caspase activation when we disrupted either  
417 mitochondrial physiology, with MitoXhoI, or transport, with Milton RNAi. In wild type  
418 neurons we would normally see robust PARP-IR signal in the dendrites of *ddaC* at 7h APF  
419 (Fig 6G-I).

420 As mitochondria are essential for cellular viability we checked if these disruptions  
421 impacted the survival of neurons and/or the morphology of their dendritic arborizations at  
422 larval stages and found the number of *ddaC* neurons remained the same, as did the numbers of  
423 primary, secondary and tertiary arbor branches (unpublished observations).

424 As the removal of larval neurons by apoptosis is also critical for restructuring the  
425 sensory system, we wondered whether mitochondria are also important for caspase activation  
426 and cell death and removal of class III da neurons ddaA and ddaF (Figure 6). As described,  
427 both ddaA and ddaF undergo apoptosis within 6h APF and we detect active caspases in these  
428 neurons very early during metamorphosis (see Fig 1C and Fig 3). When we disrupted  
429 mitochondrial function by expressing MitoXhoI or dysregulated fission by overexpressing  
430 Drp1, cell death was blocked (Fig 6J-N). In most cases, the cell body and some dendrites of  
431 ddaA were still visible at 6hAPF while ddaF had almost all of its dendrites as well as the cell  
432 body intact (Fig 6J-N). These changes in morphology were also mirrored in the dynamics of  
433 caspase activation. In wild type neurons at 2h APF we see that the nuclei in both ddaA and  
434 ddaF neurons stained positive for Dcp-1 (Fig 6 O, yellow arrows), which correlates with their  
435 morphology showing clear signs of cell death. We know that other dorsal neurons not labelled  
436 with the *GAL4* driver (Fig 6 O, white arrowhead) are positive for active Dcp-1. In contrast,  
437 when we imaged ddaA and ddaF neurons expressing MitoXhoI and Drp1, no active Dcp-1 was  
438 detected (Fig 6 O-Q). Thus, we show a clear link between mitochondria and caspase activation  
439 and cell death in these doomed neurons. In summary, mitochondria appear to be important  
440 players in both pruning and cell death of da sensory neurons and are important for caspase  
441 activation within these neurons during metamorphic remodelling of the sensory nervous system  
442 of *Drosophila*.

443

#### 444 **Discussion**

445 Nervous systems are built by both *progressive* development phenomena, such as cell division  
446 and cell growth, and *regressive* phenomena, such as cell death and pruning (67). Here we focus  
447 on the pruning and cell death of identifiable neurons in the remodelling sensory system of  
448 *Drosophila*. In our previous work we used the genetically encoded caspase probe

449 CD8::PARP::Venus to visualise caspase activity in the dendritic branches of single pruning da  
450 sensory neurons at 6 – 7h APF (10). We found that caspase activation only occurred in dendritic  
451 branches that had been severed from the main body of the neuron and found no evidence for  
452 caspase activity early, prior to branches being cut. In contrast, our colleagues reported an early  
453 activation of caspases at 4h APF, using an antibody against cleaved human Caspase-3, and  
454 observed a suppression of branch thinning and severing in DRONC null neurons (9). As these  
455 two dataset seemed irreconcilable, we felt motivated to further investigate the timing of caspase  
456 activation and the role of other components of the apoptotic machinery during the early phases  
457 of dendrite pruning.

458 To look at the timing of caspase activation during pruning we first used a polyclonal  
459 antibody raised against a cleaved form of the *Drosophila* effector caspase Dcp-1. With this we  
460 found that the pruning neuron, ddaC, showed an early and weak cytoplasmic signal for ‘cleaved  
461 Dcp-1’ soon after the onset of metamorphosis, significantly earlier than our previous  
462 CD8::PARP::Venus reporter data had shown. This anti-cleaved Dcp-1 antibody recognises  
463 epitopes on cleaved Dcp-1 and on cleaved Drice (51) and so can be considered to be a good  
464 reporter of DRONC activity. These data suggests that DRONC is active early, prior to dendritic  
465 branch severing and is consistent with the data from the cleaved human Caspase-3 antibody  
466 (9).

467 Since in our previous work (10) we saw no ‘early’ effector caspase activity with the  
468 CD8::PARP::Venus probe, we wondered if that was due to the sensitivity of our probe or  
469 because there is no effector caspase activity at this earlier time point. An absence of effector  
470 activity was a clear possibility as a number of studies looking at non-apoptotic events, such as  
471 arista morphogenesis (52) and border cell migration (53), found that only DRONC activity is  
472 required. To address this directly we used our new genetically encoded effector caspase probe  
473 ‘SR4VH’ (40). We recently used SR4VH to describe apoptosis in newly born neurons in the

474 ventral nerve cord during postembryonic neurogenesis (40) and found it was sensitive. The  
475 dynamics of SR4VH cleavage in the pruning neuron ddaC clearly showed, for the first time,  
476 that effector caspase activity occurs very early, prior to overt changes in the structure of  
477 proximal dendrites and much before branch severing. The improved sensitivity in revealing  
478 caspase activation could be due to a combination of features; SR4VH is a live reporter that  
479 undergoes a change in cellular localisation from the cell membrane to the nuclear compartment  
480 and the use of 4x tandem caspase cleavage sites rather than a single one. Our previous  
481 observations of active caspases in severed branches (10) had suggested to us that caspase  
482 activation was ‘held in check’ within pruning neurons because the activity was physically  
483 separated from the ‘main body’ of the neuron. These new data show that active caspases are  
484 present soon after 0h APF and are not in a physically ‘separate’ compartment. How then does  
485 ddaC deploy active caspases but not undergo programmed cell death itself? Immunostaining  
486 with the active Dcp-1 antibody pointed toward the levels of caspase activity being lower in the  
487 pruning neuron ddaC compared to the dying neurons, ddaA/ddaF. As class III (dying) and class  
488 IV (pruning) da neurons are in close proximity, on the body wall, using a live probe we could  
489 simultaneously monitor caspase activation in both. The SR4VH data mirrored observations  
490 with active-Dcp-1 antibody pointing to lower levels of caspase activity in pruning neurons than  
491 in dying neurons. A caveat to this could have been that the differences we see in the intensity  
492 of ‘cleaved’ nuclear Venus were the result of technical issues, i.e. different GAL4 levels in the  
493 two neuronal cell types or due to a ‘dilution’ of the reporter over a larger sized dendritic tree.  
494 Fortunately, having two different fluorescence proteins on either side of the caspase cleavage  
495 sites meant we could easily make a ratiometric comparison and exclude these concerns.

496 We know from other studies that apoptosis is not binary and that a cell may exhibit  
497 some cellular and molecular features of programmed cell death yet still survive (68). This  
498 landscape was explored by Florentin and Arama who precisely manipulated the levels of

499 effector caspase proenzymes and showed that cellular lethality occurs once caspase activity  
500 levels reach a critical threshold (69). Below threshold, cells fail to induce apoptosis and above  
501 it a positive feedback loop accelerates the apoptotic decision (69). Ditzel et al., 2008  
502 demonstrated how low effector caspase levels could be maintained in cells by a negative  
503 feedback regulation where DIAP inactivates caspases without degradation (70). It may be that  
504 levels of activity below such apoptotic thresholds facilitate non-lethal, non-apoptotic  
505 developmental functions, such a cell fate specification (71) and plasticity at synapses (72). This  
506 will be clearer in the future when specific targets of caspases are identified in both apoptotic  
507 versus non-apoptotic contexts.

508         Taken together, these data show that within the pruning neuron *ddaC* there is early  
509 DRONC caspase activity, that cleaves an effector caspase, either *Dcp-1/Drice*, and that effector  
510 caspases are active during the early phases of dendrite pruning, at levels that are clearly lower  
511 than in *da* neurons that are undergoing apoptosis.

512         Following these observations, we wondered what factors could be regulating the sub-  
513 lethal levels of caspase activation within pruning *da* neurons. Until now only a small number  
514 of regulators of sub-lethal non-apoptotic caspase function have been identified. Work on  
515 sensory organ precursor (SOP) development in the *Drosophila* wing imaginal discs revealed  
516 that I-kappaB kinase  $\epsilon$  (IKK) indirectly regulates DRONC via phosphorylation and accelerated  
517 destruction of DIAP1, but such regulation could work independently of the RHG proteins (73).  
518 Another reported regulator of sub-lethal caspase activity is *Tango7/eIF3m*, which has been  
519 shown to interact with the apoptosome in testis (74), to regulate caspase activity in the salivary  
520 glands (75) and was implicated in the regulation of sub-lethal caspase activation in pruning *da*  
521 neurons (75). Interestingly, we found that knocking down *Tango7* in *ddaC* neurons inhibited  
522 pruning but had no effect on caspase activation *in vivo* (Supp Fig. 2E,F).

523           The RHG proteins (Reaper, Grim, Hid & Sickie) are widely recognised as key  
524 regulators of cell death but have not been implicated in the regulation of sub-lethal, non-  
525 apoptotic caspase function. Our data, using MARCM clonal analysis, unequivocally shows that  
526 loss of these proteins lead to a block of dendritic pruning in the sensory neuron ddaC. To  
527 narrow down which of these proteins are required we used a series of deletions and found that  
528 mutants for both Reaper and Grim suppressed dendrite pruning but neither alone was as  
529 disruptive as removing both together. Such cooperative role of RHG genes in cell death has  
530 previously been shown in the midline cells of CNS (76,77) and dMP2 neurons in late  
531 *Drosophila* embryos (78). Another possibility is that the regulatory regions of RHG genes are  
532 important for their effective function in the pruning neurons. An enhancer element located  
533 between Reaper and Grim genes called the Neuroblast Regulatory Region (NBRR) plays an  
534 important role in cell death in *Drosophila* embryonic and larval neuroblasts (79). Our mutant  
535 allele of *reaper*, just has the coding region removed, the regulatory region intact and this may  
536 result a weaker phenotype because the full cis-regulatory region allows appropriate expression  
537 of the other RHG genes (79,80). This may also explain why *H99* MARCM clones as well as  
538 *H99/XR38*, show such a strong pruning defect when compared with the single gene mutants  
539 over *H99* deficiency.

540           Interestingly out of the three RHG genes, we found that *hid* mutants did not result in a  
541 pruning phenotype. This was unexpected because in the context of mitochondrial caspase  
542 activation, both Reaper and Grim are known to bind to Hid to form a multimeric complex  
543 that strongly promotes apoptosis (30). Interestingly, Hid also has a wider expression pattern  
544 than Rpr or Grim and is expressed in both apoptotic as well as non-apoptotic cells (81). In  
545 case of DNA damage induced cell death like on exposure to ionising radiation, apoptosis is  
546 dependent more on Hid than on any of the other RHG genes (82). Although, it may be  
547 possible that Reaper can still localise to the mitochondria without Hid via a GH3-lipid



548 interaction (29), multiple studies have shown Reaper to be more efficient at auto-  
549 ubiquitylating and degrading DIAP1(26,29) and more potent at inducing death (30) when  
550 present on the mitochondrial membrane. The strong block of dendrite severing in H99  
551 MARCM single cell loss of function data we present here is striking, something we and  
552 others (83) have not seen upon removal of DRONC or following the downregulation of  
553 effector caspases (see Supp Fig 3). This difference raises the possibility that removal of the  
554 RHG proteins may result in a more significant pruning phenotype because of a failure to  
555 destroy DIAP blocking both initiator and all effector caspase function. Another possibility  
556 may be that there are as yet unknown ‘caspase independent’ functions for the RHG proteins,  
557 that are important in neuron remodelling. Abdelwahid *et al.*, proposed that in addition to  
558 inhibiting DIAPs, Reaper also localises to mitochondria and permeabilises it, which is  
559 possibly a slower process than the rapid DIAP inhibition and caspase activation (32). It is  
560 possible that this slow and weak caspase activation is more significant in remodelling  
561 neurons. In addition to activation of caspases, both Reaper and Grim have also been indicated  
562 to play a role in inhibition of DIAP1 translation which, in case of Reaper, has been suggested  
563 to be crucial for cell death induction in mammalian cells (see review (84) for details). During  
564 early pupal development, DIAP1 protein levels are higher in the ddaC neurons as compared  
565 to their neighbouring ddaA/ddaF (35), suggesting that the levels of DIAP1 are differentially  
566 regulated during development. Whether the RHG proteins are involved in such mechanisms  
567 in a non-apoptotic context in these neurons is something to be investigated further.

568         Since the RHG proteins have been shown to intimately associate with mitochondria and  
569 because there has been an increasing body of work linking mitochondrial dynamics to caspase  
570 activation, we decided to investigate whether mitochondria are critical for remodelling of the  
571 sensory system. When we overexpressed TFAM and MitoXhoI in single neurons we saw robust  
572 disruptions in both dendrite severing and clearance. When we changed mitochondrial



573 localization by manipulating transport and their fission/fusion dynamics in a cell-autonomous  
574 manner in ddaC neuron, we observed consistent blocks of severing and branch clearance.  
575 Notably, they also resulted in fewer mitochondria per unit length of dendrite. These  
576 mitochondrial perturbations caused a suppression of caspase activation in pruning dendritic  
577 branches. Taken together we found that the location of mitochondria within the dendritic  
578 arborizations and/or their total number is critical for normal pruning to take place.

579 In addition, we found that the suppression of caspase activation by mitochondrial  
580 perturbations also impacted caspases in the ‘doomed’ dying class III da neurons ddaA/ddaF  
581 and that they failed to undergo programmed cell death at the onset of metamorphosis.  
582 Although the role that mitochondria and cytochrome c play in apoptosis in *Drosophila* has  
583 been an open and somewhat awkward question (85), our data here brings insight to and  
584 strong support for the idea that mitochondria are playing a key role in caspase activation *in*  
585 *vivo* in dying *Drosophila* sensory neurons.

586 In summary, our study shows that during da neuron pruning, caspases are active earlier  
587 than previously thought and that effector caspase activity is lower in pruning than in dying  
588 neurons. We reveal that the pro-apoptotic factors Reaper and Grim are required for neuronal  
589 pruning in the sensory system of *Drosophila*. We find that the location and/or function of  
590 mitochondria are critical for pruning and caspase activation in both remodelling and dying  
591 neurons. These data on the sub-lethal regulation of caspases are consistent with a growing body  
592 of work in flies of an axis of mitochondrial fission/fusion and caspase activation. Looking  
593 forwards, we hope that by genetically tagging these RHG proteins and comparing their  
594 dynamics and localisation in pruning versus dying neurons will give us greater insights into  
595 their mechanism of action in sub-lethal, non-apoptotic processes.

596

597

598 **Author contributions**

599 AM and DW conceptualised the project, designed experiments and wrote the manuscript.  
600 Experiments and analysis were performed by AM except for Figure 2 and the intensity analysis  
601 in Figure 3, which were done by SP. Hid and Reaper mutants were generated by SK. All authors  
602 read the final manuscript and provided feedback.

603

604 **Acknowledgements**

605 We would like to thank Nicolas Loncle for initial observations on caspase activation in  
606 sensory neurons with *Apoliner* and SR4VH. We would like to thank Bloomington Stock  
607 Centre, Tadashi Uemura, Kristin White, Joe Bateman and Alex Whitworth for providing  
608 several fly lines. Thanks to FengWei Yu for providing us with the antibody against Sox 14.  
609 Thanks to Paul Conduit for his generosity in providing reagents, imaging facility and time to  
610 generate some key data for the manuscript. Many thanks to Joe Bateman and Alberto Baena-  
611 Lopez for reading and feedback on the manuscript. All the Williams lab members for their  
612 help and assistance with maintaining and sending fly stocks.

613

614 **Competing interests**

615 The authors declare no competing or financial interests.

616

617

618

619

620

621

622

623

624 **References**

625

- 626 1. Baehrecke EH. How death shapes life during development. *Nat Rev Mol Cell Biol.*  
627 Nature Publishing Group; 2002 Oct;3(10):779–87.
- 628 2. Kuranaga E, Miura M. Nonapoptotic functions of caspases: caspases as regulatory  
629 molecules for immunity and cell-fate determination. *Trends in Cell Biology.* 2007  
630 Mar;17(3):135–44.
- 631 3. Dekkers MPJ, Nikolettou V, Barde Y-A. Death of developing neurons: New  
632 insights and implications for connectivity. *J Cell Biol.* 2013 Nov 11;203(3):385–93.
- 633 4. Mukherjee A, Williams DW. More alive than dead: non-apoptotic roles for caspases in  
634 neuronal development, plasticity and disease. *Cell Death Differ.* Nature Publishing  
635 Group; 2017 Aug;24(8):1411–21.
- 636 5. Hollville E, Deshmukh M. Physiological functions of non-apoptotic caspase activity in  
637 the nervous system. *Seminars in Cell and Developmental Biology.* 2018 Oct;82:127–  
638 36.
- 639 6. Lockshin RA, Williams CM. Programmed cell death—II. Endocrine potentiation of  
640 the breakdown of the intersegmental muscles of silkmoths. *JOURNAL OF INSECT*  
641 *PHYSIOLOGY* [Internet]. 1964;10:643–9. Available from:  
642 <https://www.sciencedirect.com/science/article/pii/0022191064900344>
- 643 7. Lockshin RA, Williams CM. PROGRAMMED CELL DEATH--I. CYTOLOGY OF  
644 DEGENERATION IN THE INTERSEGMENTAL MUSCLES OF THE PERNYI  
645 SILKMOTH. *JOURNAL OF INSECT PHYSIOLOGY.* 1965 Feb;11(2):123–33.
- 646 8. Truman JW. Metamorphosis of the central nervous system of *Drosophila*. *J Neurobiol.*  
647 John Wiley & Sons, Ltd; 1990 Oct;21(7):1072–84.
- 648 9. Kuo CT, Zhu S, Younger S, Jan LY, Jan YN. Identification of E2/E3 Ubiquitinating  
649 Enzymes and Caspase Activity Regulating *Drosophila* Sensory Neuron Dendrite  
650 Pruning. *Neuron.* 2006 Aug;51(3):283–90.
- 651 10. Williams DW, Kondo S, Krzyzanowska A, Hiromi Y, Truman JW. Local caspase  
652 activity directs engulfment of dendrites during pruning. *Nat Neurosci.* 2006 Sep  
653 17;9(10):1234–6.
- 654 11. Schoenmann Z, Assa-Kunik E, Tiomny S, Minis A, Haklai-Topper L, Arama E, et al.  
655 Axonal degeneration is regulated by the apoptotic machinery or a NAD<sup>+</sup>-sensitive  
656 pathway in insects and mammals. *J Neurosci.* Society for Neuroscience; 2010 May  
657 5;30(18):6375–86.
- 658 12. Cusack CL, Swahari V, Henley WH, Ramsey JM, Deshmukh M. Distinct pathways  
659 mediate axon degeneration during apoptosis and axon-specific pruning. *Nature*  
660 Publishing Group; 2013 May 8;:1–11.

- 661 13. Unsain N, Higgins JM, Parker KN, Johnstone AD, Barker PA. XIAP regulates caspase  
662 activity in degenerating axons. *CellReports*. 2013 Aug 29;4(4):751–63.
- 663 14. Yaron A, Schuldiner O. Common and Divergent Mechanisms in Developmental  
664 Neuronal Remodeling and Dying Back Neurodegeneration. *Current Biology*. Elsevier  
665 Ltd; 2016 Jul 11;26(13):R628–39.
- 666 15. Parrish AB, Freel CD, Kornbluth S. Cellular Mechanisms Controlling Caspase  
667 Activation and Function. *Cold Spring Harbor Perspectives in Biology*. 2013 Jun  
668 3;5(6):a008672–2.
- 669 16. Julien O, Wells JA. Caspases and their substrates. *Cell Death Differ*. Nature  
670 Publishing Group; 2017 Aug;24(8):1380–9.
- 671 17. Clavier A, Rincheval-Arnold A, Colin J, Mignotte B, Guénel I. Apoptosis in  
672 *Drosophila*: which role for mitochondria? *Apoptosis*. Springer US; 2015 Dec  
673 17;21(3):239–51.
- 674 18. Quinn LM, Dorstyn L, Mills K, Colussi PA, Chen P, Coombe M, et al. An essential  
675 role for the caspase dronc in developmentally programmed cell death in *Drosophila*. *J*  
676 *Biol Chem*. American Society for Biochemistry and Molecular Biology; 2000 Dec  
677 22;275(51):40416–24.
- 678 19. Xu D, Wang Y, Willecke R, Chen Z, Ding T, Bergmann A. The effector caspases  
679 drICE and dcp-1 have partially overlapping functions in the apoptotic pathway in  
680 *Drosophila*. *Cell Death Differ*. 2006 Oct;13(10):1697–706.
- 681 20. Xu D, Woodfield SE, Lee TV, Fan Y, Antonio C, Bergmann A. Genetic control of  
682 programmed cell death (apoptosis) in *Drosophila*. *fly*. Taylor & Francis; 2009  
683 Jan;3(1):78–90.
- 684 21. Du C, Fang M, Li Y, Li L, Wang X. Smac, a mitochondrial protein that promotes  
685 cytochrome c-dependent caspase activation by eliminating IAP inhibition. *Cell*. 2000  
686 Jul 7;102(1):33–42.
- 687 22. Verhagen AM, Ekert PG, Pakusch M, Silke J, Connolly LM, Reid GE, et al.  
688 Identification of DIABLO, a mammalian protein that promotes apoptosis by binding to  
689 and antagonizing IAP proteins. *Cell*. 2000 Jul 7;102(1):43–53.
- 690 23. Clavería C, Albar JP, Serrano A, Buesa JM, Barbero JL, Martínez-A C, et al.  
691 *Drosophila grim* induces apoptosis in mammalian cells. *The EMBO Journal*. John  
692 Wiley & Sons, Ltd; 1998 Dec 15;17(24):7199–208.
- 693 24. Clavería C, Caminero E, Martínez-A C, Campuzano S, Torres M. GH3, a novel  
694 proapoptotic domain in *Drosophila Grim*, promotes a mitochondrial death pathway.  
695 *The EMBO Journal*. John Wiley & Sons, Ltd; 2002 Jul 1;21(13):3327–36.
- 696 25. Clavería C, Martínez-A C, Torres M. A Bax/Bak-independent mitochondrial death  
697 pathway triggered by *Drosophila Grim GH3* domain in mammalian cells. *J Biol Chem*.  
698 2004 Jan 9;279(2):1368–75.

- 699 26. Olson MR, Holley CL, Gan EC, Colón-Ramos DA, Kaplan B, Kornbluth S. A GH3-  
700 like domain in reaper is required for mitochondrial localization and induction of IAP  
701 degradation. *J Biol Chem. American Society for Biochemistry and Molecular Biology*;  
702 2003 Nov 7;278(45):44758–68.
- 703 27. Haining WN, Carboy-Newcomb C, Wei CL, Steller H. The proapoptotic function of  
704 *Drosophila Hid* is conserved in mammalian cells. *Proc Natl Acad Sci USA. National*  
705 *Academy of Sciences*; 1999 Apr 27;96(9):4936–41.
- 706 28. Morishita J, Kang M-J, Fidelin K, Ryoo HD. CDK7 regulates the mitochondrial  
707 localization of a tail-anchored proapoptotic protein, Hid. *CellReports*. 2013 Dec  
708 26;5(6):1481–8.
- 709 29. Freel CD, Richardson DA, Thomenius MJ, Gan EC, Horn SR, Olson MR, et al.  
710 Mitochondrial localization of Reaper to promote inhibitors of apoptosis protein  
711 degradation conferred by GH3 domain-lipid interactions. *J Biol Chem. American*  
712 *Society for Biochemistry and Molecular Biology*; 2008 Jan 4;283(1):367–79.
- 713 30. Sandu C, Ryoo HD, Steller H. *Drosophila* IAP antagonists form multimeric complexes  
714 to promote cell death. *J Cell Biol*. 2010 Sep 20;190(6):1039–52.
- 715 31. Dorstyn L, Read S, Cakouros D, Huh JR, Hay BA, Kumar S. The role of cytochrome  
716 c in caspase activation in *Drosophila melanogaster* cells. *J Cell Biol*. 2002 Mar  
717 18;156(6):1089–98.
- 718 32. Abdelwahid E, Yokokura T, Krieser RJ, Balasundaram S, Fowle WH, White K.  
719 Mitochondrial disruption in *Drosophila* apoptosis. *Developmental Cell*. 2007  
720 May;12(5):793–806.
- 721 33. Otera H, Mihara K. Mitochondrial dynamics: functional link with apoptosis. *Int J Cell*  
722 *Biol. Hindawi*; 2012;2012(5-6):821676–10.
- 723 34. Ainsley JA, Pettus JM, Bosenko D, Gerstein CE, Zinkevich N, Anderson MG, et al.  
724 Enhanced locomotion caused by loss of the *Drosophila* DEG/ENaC protein  
725 Pickpocket1. *Current Biology*. 2003 Sep 2;13(17):1557–63.
- 726 35. Rumpf S, Lee SB, Jan LY, Jan YN. Neuronal remodeling and apoptosis require VCP-  
727 dependent degradation of the apoptosis inhibitor DIAP1. *Development*. Oxford  
728 University Press for The Company of Biologists Limited; 2011 Mar;138(6):1153–60.
- 729 36. Siegrist SE, Haque NS, Chen C-H, Hay BA, Hariharan IK. Inactivation of both Foxo  
730 and reaper promotes long-term adult neurogenesis in *Drosophila*. *Curr Biol*. 2010 Apr  
731 13;20(7):643–8.
- 732 37. Cagin U, Duncan OF, Gatt AP, Dionne MS, Sweeney ST, Bateman JM. Mitochondrial  
733 retrograde signaling regulates neuronal function. *Proc Natl Acad Sci USA*. 2015 Nov  
734 3;112(44):E6000–9.
- 735 38. Xu H, DeLuca SZ, O'Farrell PH. Manipulating the metazoan mitochondrial genome  
736 with targeted restriction enzymes. *Science. American Association for the*  
737 *Advancement of Science*; 2008 Jul 25;321(5888):575–7.

- 738 39. Park J, Lee G, Chung J. The PINK1–Parkin pathway is involved in the regulation of  
739 mitochondrial remodeling process. *Biochemical and Biophysical Research*  
740 *Communications*. Elsevier Inc; 2009 Jan 16;378(3):518–23.
- 741 40. Pop S, Chen C-L, Sproston CJ, Kondo S, Ramdya P, Williams DW. Extensive and  
742 diverse patterns of cell death sculpt neural networks in insects. *Elife*. eLife Sciences  
743 Publications Limited; 2020 Sep 7;9:13901.
- 744 41. Loncle N, Williams DW. An interaction screen identifies headcase as a regulator of  
745 large-scale pruning. *J Neurosci*. 2012 Nov 28;32(48):17086–96.
- 746 42. Broadie K, Bate M. Activity-dependent development of the neuromuscular synapse  
747 during *Drosophila* embryogenesis. *Neuron*. 1993 Oct;11(4):607–19.
- 748 43. Kondo S, Ueda R. Highly improved gene targeting by germline-specific Cas9  
749 expression in *Drosophila*. *Genetics*. *Genetics*; 2013 Nov;195(3):715–21.
- 750 44. W B Grueber LYJAYNJ. Tiling of the *Drosophila* epidermis by multidendritic sensory  
751 neurons. 2002 May 15;;1–12.
- 752 45. Williams DW, Truman JW. Cellular mechanisms of dendrite pruning in *Drosophila*:  
753 insights from in vivo time-lapse of remodeling dendritic arborizing sensory neurons.  
754 *Development*. 2005 Aug;132(16):3631–42.
- 755 46. Kuo CT, Jan LY, Jan YN. Dendrite-specific remodeling of *Drosophila* sensory  
756 neurons requires matrix metalloproteases, ubiquitin-proteasome, and ecdysone  
757 signaling. *Proc Natl Acad Sci USA*. National Academy of Sciences; 2005 Oct  
758 18;102(42):15230–5.
- 759 47. Williams DW, Shepherd D. Persistent larval sensory neurons in adult *Drosophila*  
760 *melanogaster*. *J Neurobiol*. *J Neurobiol*; 1999 May;39(2):275–86.
- 761 48. Williams DW. Mechanisms of Dendritic Elaboration of Sensory Neurons in  
762 *Drosophila*: Insights from In Vivo Time Lapse. *Journal of Neuroscience*. 2004 Feb  
763 18;24(7):1541–50.
- 764 49. Shimono K, Fujimoto A, Tsuyama T, Yamamoto-Kochi M, Sato M, Hattori Y, et al.  
765 Multidendritic sensory neurons in the adult *Drosophila* abdomen: origins, dendritic  
766 morphology, and segment- and age-dependent programmed cell death. *Neural Dev*.  
767 2009;4(1):37–21.
- 768 50. Han C, Song Y, Xiao H, Wang D, Franc NC, Jan LY, et al. Epidermal Cells Are the  
769 Primary Phagocytes in the Fragmentation and Clearance of Degenerating Dendrites in  
770 *Drosophila*. *Neuron*. Elsevier Inc; 2014 Feb 5;81(3):544–60.
- 771 51. Li M, Sun S, Priest J, Bi X, Fan Y. Characterization of TNF-induced cell death in  
772 *Drosophila* reveals caspase- and JNK-dependent necrosis and its role in tumor  
773 suppression. *Cell Death Dis*. Nature Publishing Group; 2019 Aug 14;10(8):613–4.
- 774 52. Cullen K, McCall K. Role of programmed cell death in patterning the *Drosophila*  
775 antennal arista. *Developmental Biology*. 2004 Nov 1;275(1):82–92.



- 776 53. Geisbrecht ER, Montell DJ. A role for *Drosophila* IAP1-mediated caspase inhibition in  
777 Rac-dependent cell migration. *Cell*. 2004 Jul 9;118(1):111–25.
- 778 54. Song Z, Guan B, Bergman A, Nicholson DW, Thornberry NA, Peterson EP, et al.  
779 Biochemical and genetic interactions between *Drosophila* caspases and the  
780 proapoptotic genes *rpr*, *hid*, and *grim*. *Molecular and Cellular Biology*. American  
781 Society for Microbiology Journals; 2000 Apr;20(8):2907–14.
- 782 55. Bardet P-L, Kolahgar G, Mynett A, Miguel-Aliaga I, Briscoe J, Meier P, et al. A  
783 fluorescent reporter of caspase activity for live imaging. *Proc Natl Acad Sci USA*.  
784 National Academy of Sciences; 2008 Sep 16;105(37):13901–5.
- 785 56. Milán M, Campuzano S, García-Bellido A. Developmental parameters of cell death in  
786 the wing disc of *Drosophila*. *Proc Natl Acad Sci USA*. National Academy of Sciences;  
787 1997 May 27;94(11):5691–6.
- 788 57. Lee G, Park JH. Programmed cell death reshapes the central nervous system during  
789 metamorphosis in insects. *Curr Opin Insect Sci*. 2020 Oct 14;43:39–45.
- 790 58. Kornbluth S, White K. Apoptosis in *Drosophila*: neither fish nor fowl (nor man, nor  
791 worm). *Journal of Cell Science*. 2005 May 1;118(Pt 9):1779–87.
- 792 59. Peterson C, Carney GE, Taylor BJ, White K. reaper is required for neuroblast  
793 apoptosis during *Drosophila* development. *Development*. Development; 2002  
794 Mar;129(6):1467–76.
- 795 60. Course MM, Wang X. Transporting mitochondria in neurons. *F1000Res*. F1000  
796 Research Limited; 2016;5(1735):1735.
- 797 61. Stowers RS, Megeath LJ, Górska-Andrzejak J, Meinertzhagen IA, Schwarz TL.  
798 Axonal transport of mitochondria to synapses depends on milton, a novel *Drosophila*  
799 protein. *Neuron*. 2002 Dec 19;36(6):1063–77.
- 800 62. Russo GJ, Louie K, Wellington A, Macleod GT, Hu F, Panchumarthi S, et al.  
801 *Drosophila* Miro is required for both anterograde and retrograde axonal mitochondrial  
802 transport. *J Neurosci*. Society for Neuroscience; 2009 Apr 29;29(17):5443–55.
- 803 63. Scott I, Youle RJ. Mitochondrial fission and fusion. Brown GC, Murphy MP, editors.  
804 *Essays Biochem*. 2010;47:85–98.
- 805 64. Verstreken P, Ly CV, Venken KJT, Koh T-W, Zhou Y, Bellen HJ. Synaptic  
806 mitochondria are critical for mobilization of reserve pool vesicles at *Drosophila*  
807 neuromuscular junctions. *Neuron*. 2005 Aug 4;47(3):365–78.
- 808 65. Trevisan T, Pendin D, Montagna A, Bova S, Ghelli AM, Daga A. Manipulation of  
809 Mitochondria Dynamics Reveals Separate Roles for Form and Function in  
810 Mitochondria Distribution. *CellReports*. 2018 May 8;23(6):1742–53.
- 811 66. van der Blik AM, Shen Q, Kawajiri S. Mechanisms of mitochondrial fission and  
812 fusion. *Cold Spring Harbor Perspectives in Biology*. Cold Spring Harbor Lab; 2013  
813 Jun 1;5(6):a011072–2.

- 814 67. Cowan WM, Fawcett JW, O'Leary DD, Stanfield BB. Regressive events in  
815 neurogenesis. *Science*. American Association for the Advancement of Science; 1984  
816 Sep 21;225(4668):1258–65.
- 817 68. Reddien PW, Cameron S, Horvitz HR. Phagocytosis promotes programmed cell death  
818 in *C. elegans*. *Nature*. Nature Publishing Group; 2001 Jul 12;412(6843):198–202.
- 819 69. Florentin A, Arama E. Caspase levels and execution efficiencies determine the  
820 apoptotic potential of the cell. *J Cell Biol*. 2012 Feb 20;196(4):513–27.
- 821 70. Ditzel M, Broemer M, Tenev T, Bolduc C, Lee TV, Rigbolt KTG, et al. Inactivation of  
822 effector caspases through nondegradative polyubiquitylation. *Molecular Cell*. 2008  
823 Nov 21;32(4):540–53.
- 824 71. Koto A, Kuranaga E, Miura M. Temporal regulation of *Drosophila* IAP1 determines  
825 caspase functions in sensory organ development. *J Cell Biol*. 2009 Oct 19;187(2):219–  
826 31.
- 827 72. Li Z, Jo J, Jia J-M, Lo S-C, Whitcomb DJ, Jiao S, et al. Caspase-3 activation via  
828 mitochondria is required for long-term depression and AMPA receptor internalization.  
829 *Cell*. 2010 May 28;141(5):859–71.
- 830 73. Kuranaga E, Kanuka H, Tonoki A, Takemoto K, Tomioka T, Kobayashi M, et al.  
831 *Drosophila* IKK-related kinase regulates nonapoptotic function of caspases via  
832 degradation of IAPs. *Cell*. 2006 Aug 11;126(3):583–96.
- 833 74. D'Brot A, Chen P, Vaishnav M, Yuan S, Akey CW, Abrams JM. Tango7 directs  
834 cellular remodeling by the *Drosophila* apoptosome. *Genes Dev*. 2013 Aug  
835 2;27(15):1650–5.
- 836 75. Kang Y, Neuman SD, Bashirullah A. Tango7 regulates cortical activity of caspases  
837 during reaper-triggered changes in tissue elasticity. *Nature Communications*. Springer  
838 US; 2017 Sep 13;:1–12.
- 839 76. Zhou L, Schnitzler A, Agapite J, Schwartz LM, Steller H, Nambu JR. Cooperative  
840 functions of the reaper and head involution defective genes in the programmed cell  
841 death of *Drosophila* central nervous system midline cells. *Proc Natl Acad Sci USA*.  
842 National Academy of Sciences; 1997 May 13;94(10):5131–6.
- 843 77. Wing JP, Zhou L, Schwartz LM, Nambu JR. Distinct cell killing properties of the  
844 *Drosophila* reaper, head involution defective, and grim genes. *Cell Death Differ*.  
845 Nature Publishing Group; 1998 Nov;5(11):930–9.
- 846 78. Miguel-Aliaga I, Thor S. Segment-specific prevention of pioneer neuron apoptosis by  
847 cell-autonomous, postmitotic Hox gene activity. *Development*. The Company of  
848 Biologists Ltd; 2004 Dec;131(24):6093–105.
- 849 79. Tan Y, Yamada-Mabuchi M, Arya R, St Pierre S, Tang W, Tosa M, et al. Coordinated  
850 expression of cell death genes regulates neuroblast apoptosis. *Development*. Oxford  
851 University Press for The Company of Biologists Limited; 2011 Jun;138(11):2197–206.



- 852 80. Lee G, Sehgal R, Wang Z, Nair S, Kikuno K, Chen C-H, et al. Essential role of grim-  
853 led programmed cell death for the establishment of corazonin-producing peptidergic  
854 nervous system during embryogenesis and metamorphosis in *Drosophila melanogaster*.  
855 *Biology Open*. The Company of Biologists Ltd; 2013 Mar 15;2(3):283–94.
- 856 81. Grether ME, Abrams JM, Agapite J, White K, Steller H. The head involution defective  
857 gene of *Drosophila melanogaster* functions in programmed cell death. *Genes Dev*.  
858 Cold Spring Harbor Lab; 1995 Jul 15;9(14):1694–708.
- 859 82. Brodsky MH, Weinert BT, Tsang G, Rong YS, McGinnis NM, Golic KG, et al.  
860 *Drosophila melanogaster* MNK/Chk2 and p53 regulate multiple DNA repair and  
861 apoptotic pathways following DNA damage. *Molecular and Cellular Biology*.  
862 American Society for Microbiology Journals; 2004 Feb;24(3):1219–31.
- 863 83. Kanamori T, Kanai MI, Dairyo Y, Yasunaga K-I, Morikawa RK, Emoto K.  
864 Compartmentalized calcium transients trigger dendrite pruning in *Drosophila* sensory  
865 neurons. *Science*. 2013 Jun 21;340(6139):1475–8.
- 866 84. Thomenius M, Kornbluth S. Multifunctional reaper: sixty-five amino acids of fury.  
867 *Cell Death Differ*. 2006 Aug;13(8):1305–9.
- 868 85. Tait SWG, Green DR. Mitochondrial regulation of cell death. *Cold Spring Harbor*  
869 *Perspectives in Biology*. Cold Spring Harbor Lab; 2013 Sep 1;5(9):a008706–6.

870

871

872

873

874

875

876

877

878

879

880

881

882

883

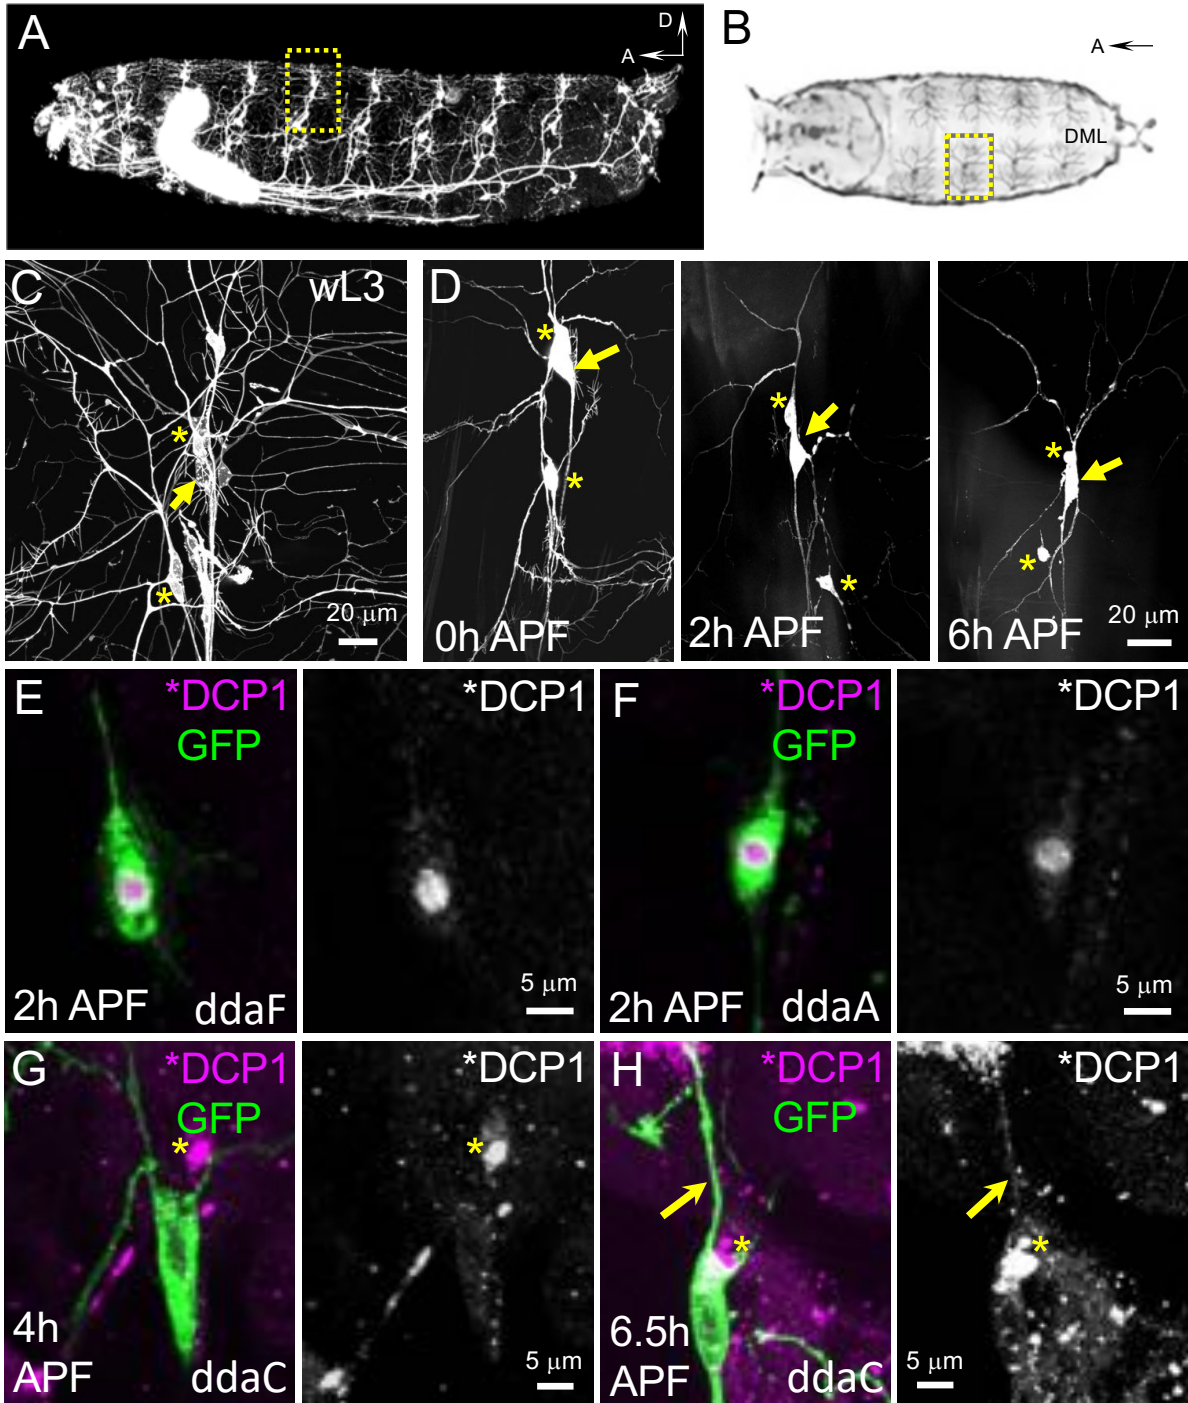

884

885

886

887

888

889

**Figure 1: The sensory system of *Drosophila* undergoes extensive remodelling at**

**metamorphosis. (A) A 2<sup>nd</sup> instar *Drosophila* larva expressing GFP in cholinergic neurons**

**(ChaGAL4>UASGFP) shows the organisation of the central and peripheral nervous system.**

Segmentally repeated arrays of sensory neurons send their axons through peripheral nerves to

the ventral nerve cord. D=dorsal, A=anterior. Yellow box indicates the position of the dorsal

890 cluster of sensory neurons on the body wall. **(B)** Drawing of an early *Drosophila* pre-pupa  
891 from above with the dorsal cluster of sensory neurons indicated by a yellow box. DML =  
892 dorsal midline. **(C)** Higher magnification of the sensory neurons in a dorsal cluster, labelled  
893 by ChaGAL4 > UAS CD8::GFP, the cell bodies of pruning Class IV ddaC (arrow) and dying  
894 class III ddaF and ddaA (asterisks). **(D)** Two class III neurons - ddaA and ddaF (asterisks)  
895 and one class IV ddaC neuron (arrow), imaged *in vivo* show neurons undergoing cell death  
896 and remodelling respectively at the onset of metamorphosis. These three neurons are revealed  
897 with two copies of ppkGAL4>UAS CD8::GFP **(E,F)** Class III neurons are labelled using 19-  
898 12 GAL4>UAS CD8::GFP. **(E)** Left panels show ddaF fixed and immunostained for GFP  
899 (green) and active effector caspase DCP-1 (magenta). Right panels showing  
900 immunoreactivity of active DCP-1 alone in greyscale. **(F)** shows ddaA. Strong active DCP-1  
901 staining is seen in the nuclear region of both dying cells **(G,H)** Left panels showing ddaC  
902 labelled using ppkCD4tdGFP, fixed and immunostained for GFP (green) and active DCP-1  
903 (magenta) right panels showing immunoreactivity of active DCP-1 alone (greyscale). Weak  
904 active effector caspase expression in the cell body and dendrites at 4h APF and active  
905 caspases can be detected in a dendrite still attached to the cell body (arrow) at 6h APF. In  
906 contrast to dying neurons, no active caspase is present in the nucleus. Asterisks mark DCP-1  
907 nuclear staining of apoptotic sensory neurons in the vicinity.  
908  
909

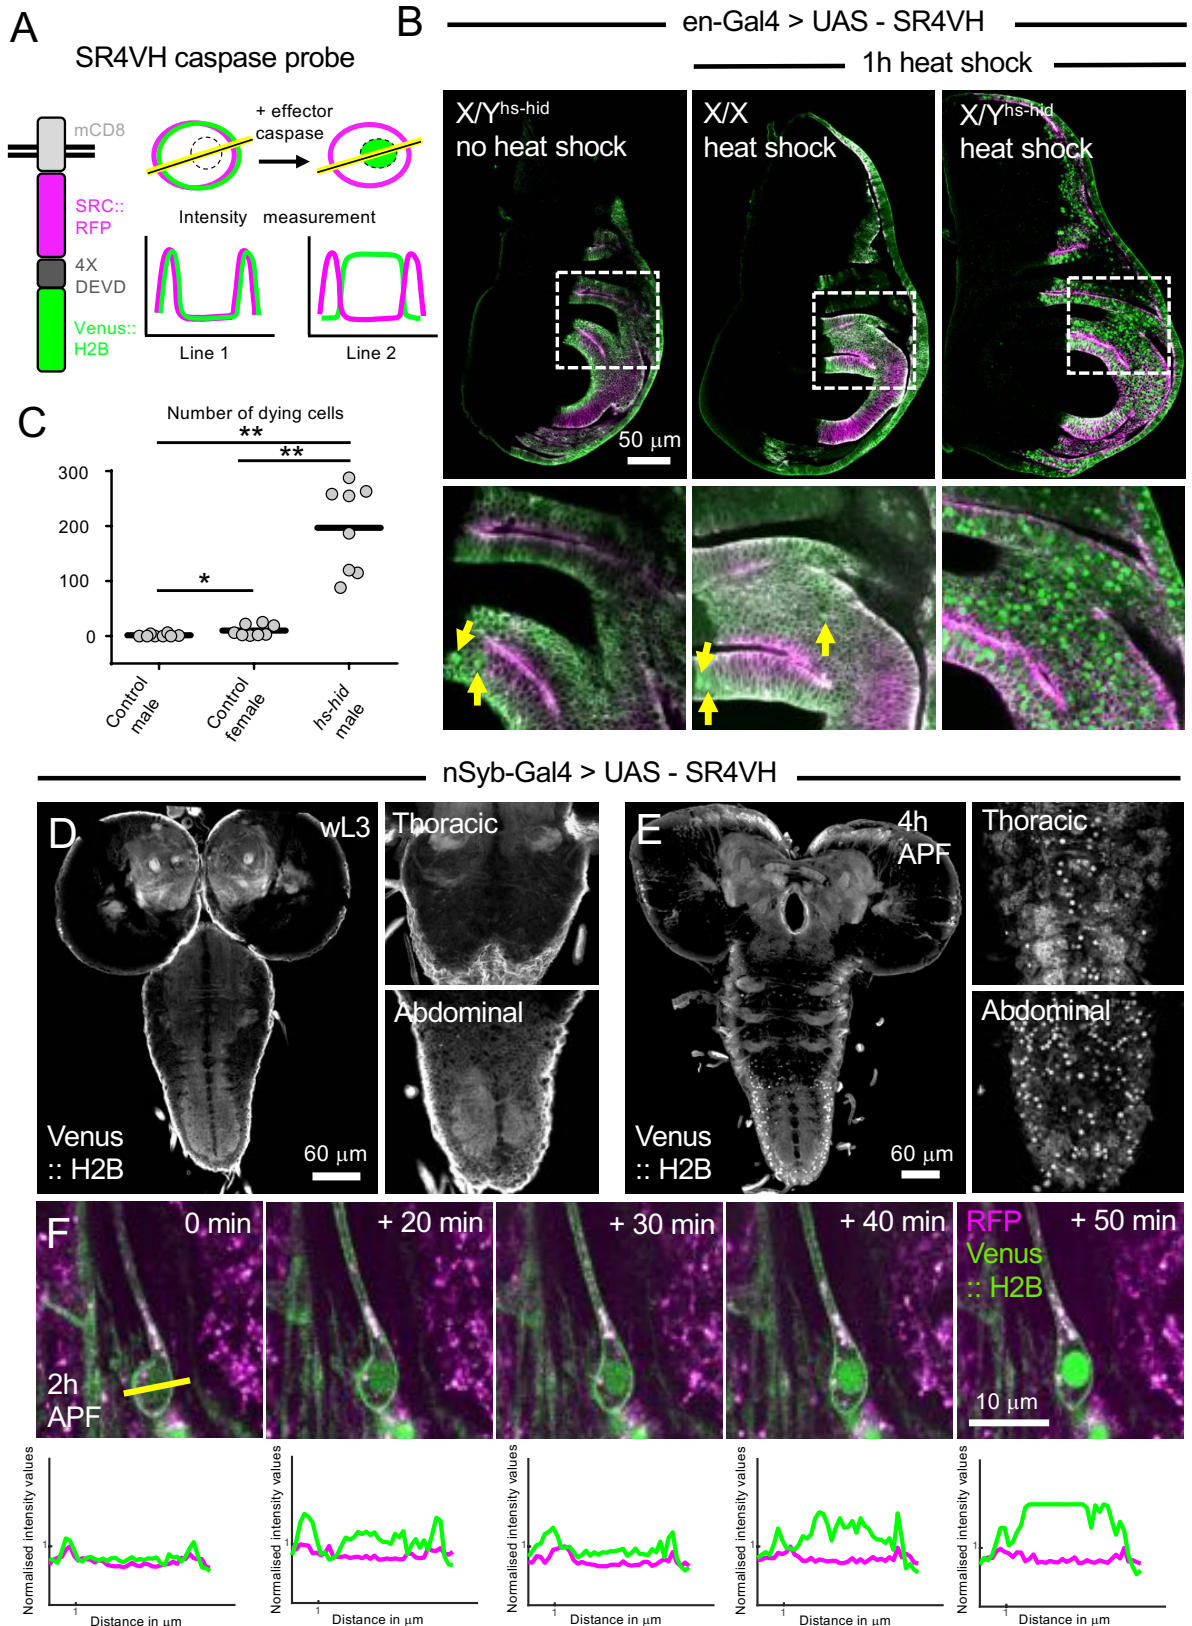

910

911 **Figure 2: The genetically encoded effector caspase reporter SR4VH reveals cell deaths**

912 *in vivo*.

913 (A) A schematic of SR4VH showing the reporter changing location following  
914 cleavage and how intensity measurements across the neuronal cell body provide a readout of  
915 caspase activity. (B) Wing discs from 3<sup>rd</sup> instar larvae expressing SR4VH under the control  
916 en-GAL4, GFP (green) and RFP (magenta). Left panel showing a disc from a “no heat  
917 shock” control male X/Y<sup>hs-hid</sup> and middle panel showing disc from “heat shocked” control  
918 female X/X containing no hs-hid transgene. Both control conditions reveal a few cells with  
919 nuclear GFP signal (arrows). Right panel shows a wing disc from a “heat shocked” male  
920 X/Y<sup>hs-hid</sup>, containing many cells with nuclear localised GFP. (C) Quantification of the  
921 number of dying cells in the wing discs in B. (D, E) nSyb-GAL4>UAS-SR4VH expressing  
922 larval and pre-pupal nervous systems dissected, fixed and immune-stained for GFP (grey).  
923 Values are reported as mean ± standard deviation and p values are reported as \* for p < 0.05  
924 and \*\* for p < 0.01.

925 (D) Left panel showing whole CNS from 3<sup>rd</sup> instar larva and right panels shows magnified  
926 images of the thoracic and abdominal regions of the VNC with no nuclear GFP signal. (E)  
927 Left panel with whole CNS from prepupae 4 hours after puparium formation (APF) along  
928 with magnified images of the thoracic and abdominal regions showing cells with nuclear  
929 localised GFP. The abdominal region has many neurons undergoing hormonally induced cell  
930 death (right hand panels). (F) Upper panel shows sequence of stills from a timelapse movie  
931 of dmd1 neuron in a pre-pupa expressing SR4VH under the control of elav<sup>C155</sup>GAL4.  
932 Imaging starts at 2h APF. The cleaved GFP accumulates in the nuclei of the dying dmd1  
933 neuron over the time course. Lower panel shows the normalised fluorescence intensity plots  
934 of dmd1 neuron at each of the time points displayed.

935  
936  
937



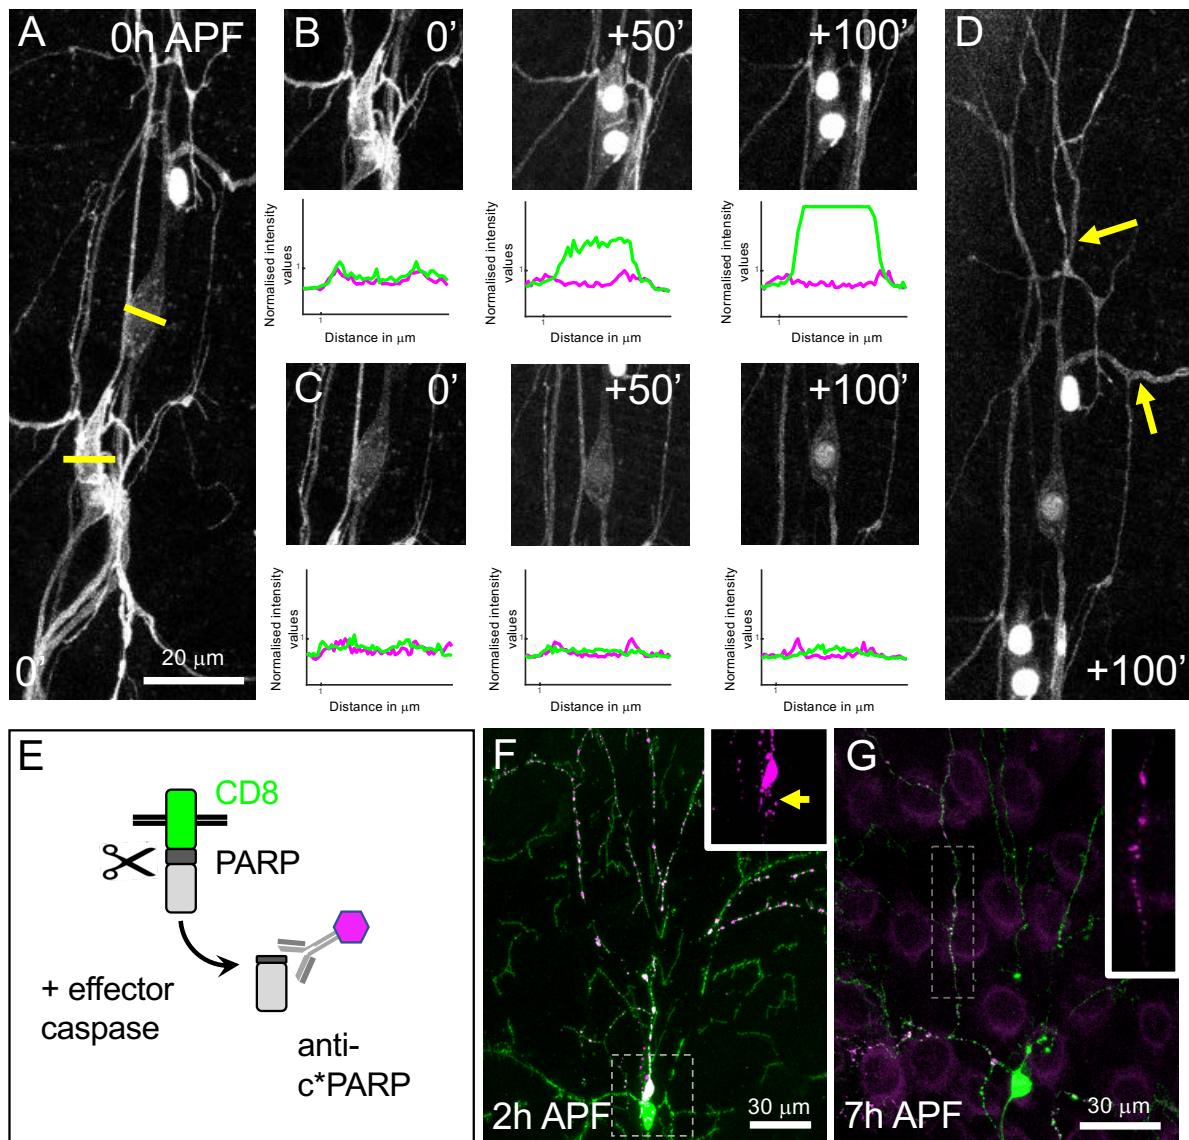

938

939

940

941

942

943

944

945

946

947

**Figure 3: The caspase effector reporter SR4VH reveals caspase activity live in pruning and dying sensory neurons during metamorphic remodelling (A)** Class III and Class IV neurons were labelled using two copies of ppkGAL4 driving UAS-SR4VH. The yellow lines mark the site for sampling of intensity measurements. **(B)** Top panels show individual timepoints of the Class III neuron *ddaA* at which the intensity measurements were made. Within 50 minutes this neuron shows a robust accumulation of nuclear GFP signal. Bottom panel depicts the normalised intensity values for Venus and RFP plotted for the same neuron over time. **(C)** Top panel showing snap shots of the Class IV neuron at the time points at which the intensity measurements were made. There is clear but weak nuclear GFP

948 accumulation even after 100 minutes of imaging. Bottom panel depicts the normalised  
949 intensity values plotted for the same neuron over time. **(D)** At the time point 100'+, when  
950 nuclear GFP is detected in the Class IV ddaC neuron, the dendritic branches are still intact  
951 (arrows). **(E)** Schematic of the effector caspase CD8::PARP::Venus probe that can be  
952 detected in fixed samples by immunostaining against cleaved PARP. **(F)** In a prepupa  
953 expressing 19-12 GAL4 and ppkGAL4>UAS CD8::PARP::Venus, the dying neurons (Class  
954 III) show cleaved PARP throughout the whole neuron in the cell body and dendrites. In the  
955 remodelling class IV neuron there is no cleaved PARP staining, apart for a few bright dots  
956 within the cell body at 2h APF (see arrow in inset). **(G)** In pruning ddaC neurons expressing  
957 UAS-CD8::PARP::Venus cleaved PARP immunoreactivity is evident in the branches at 7h  
958 APF.

959

960

961

962

963

964

965

966

967

968

969

970

971

972

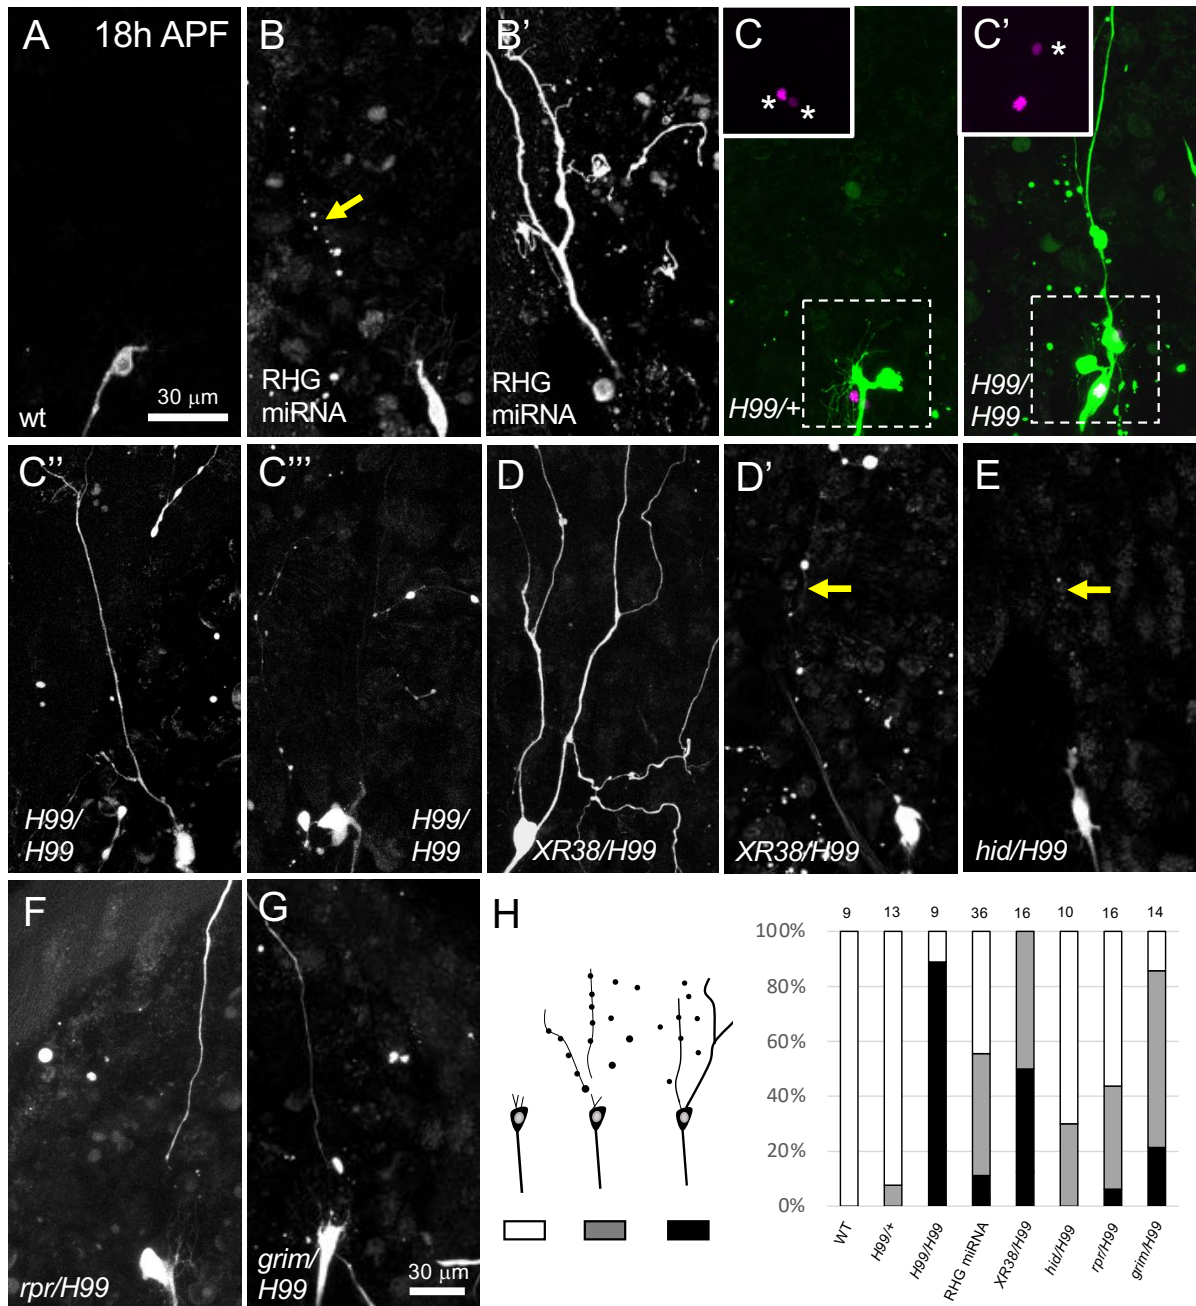

973

974 **Figure 4: The propapoptotic RHG genes reaper and grim are important for dendrite**  
 975 **pruning in the ddaC.** All ddaC neurons were imaged at 18 h APF. (A) A wild-type neuron  
 976 labelled using *ppkGAL4>UAS-CD8::GFP* shows cell body and axon with complete  
 977 clearance of dendrites at 18h APF . (B B') When expressing *ppkGAL4>UAS-CD8::GFP*,  
 978 *UAS-RHG RNAi* to knockdown reaper, hid and grim, ddaC neurons show both severing and  
 979 clearance defects (arrow). (C) example of control ddaC heterozygous for H99, soma has no  
 980 magenta nucleus. (C'-C''') Examples of H99 homozygous MARCM neurons (magenta



981 nucleus) in a pupa otherwise heterozygous for H99, ddaC neurons labelled using ppk-eGFP  
982 show strong severing and clearance defects, GAL80 minus neurons express RedStinger  
983 (magenta nucleus). **(D D')** In ppkGAL4 UAS-CD8::GFP pupae with the XR38 deficiency  
984 over the H99 deficiency ddaC neurons showed strong severing and clearance defects. **(E)**  
985 Mild clearance defects in pupae deficient in hid but heterozygous for other cell death genes.  
986 **(F)** Severing and clearance defects in pupae deficient in rpr but heterozygous for the other  
987 RHG genes. **(G)** Pupae deficient in grim and heterozygous for other cell death genes, have  
988 severing and clearance defects. **(H)** Cartoon representation of the categories used when  
989 scoring for phenotypes of ddaC neuron, white - wild type, grey - clearance phenotype and  
990 black - severing and clearance. The right panel shows the percentage representation of the  
991 different categories of phenotypes as when the RHG genes are perturbed. n numbers are  
992 depicted on the top of the bars for each genotype.

993

994

995

996

997

998

999

1000

1001

1002

1003

1004

1005

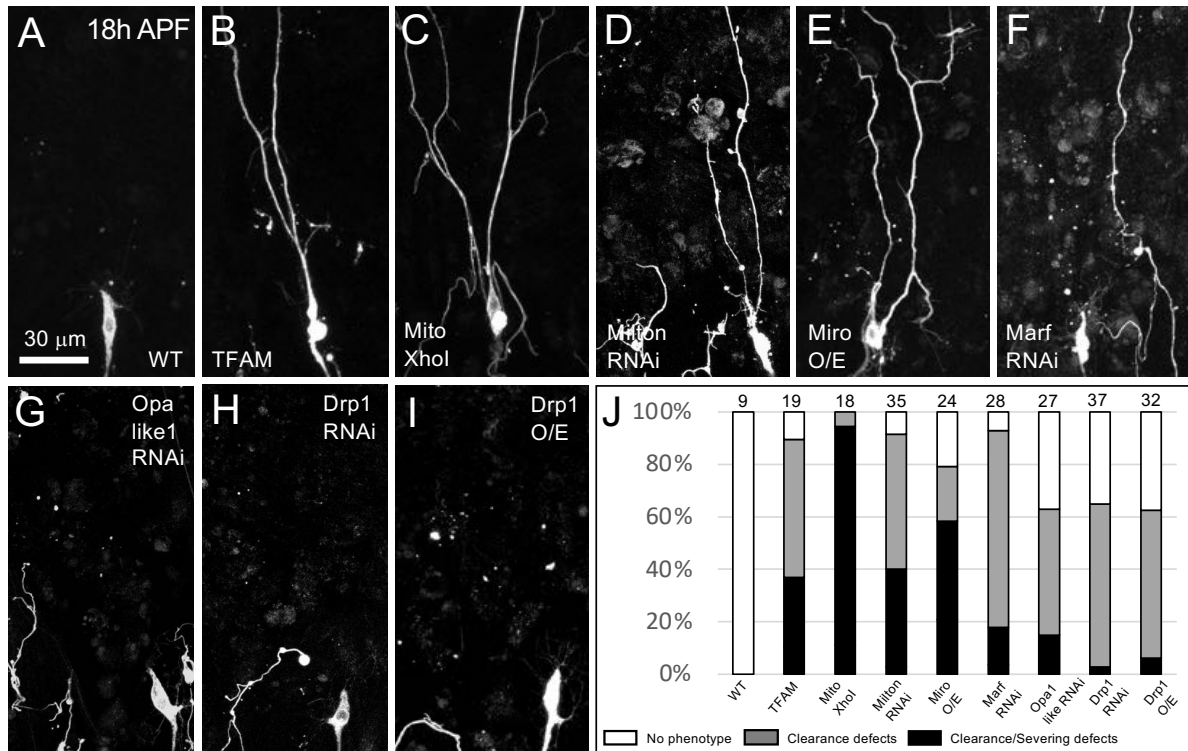

1006

1007

**Figure 5: Mitochondrial function, transport and fission/fusion are important for**

1008

**dendrite pruning in ddaC neurons. (A)** A wild type neuron labelled using

1009

ppkGAL4>UAS-CD8::GFP shows removal and clearance of dendrites by 18h APF. **(B,C)**

1010

Disruption of mitochondrial function blocks dendrite pruning of ddaC neurons. **(B)** Pupae

1011

expressing ppkGAL4>UAS-CD8::GFP and UAS-TFAM, a mitochondrial transcription

1012

factor, show a strong block in dendrite severing. **(C)** Disruption of mitochondrial function in

1013

neurons expressing ppkGAL4>UAS-CD8::GFP and UAS-MitoXhoI results in strong

1014

severing defects. **(D, E)** Disruption of mitochondrial transport impacts dendritic pruning of

1015

ddaC neurons. **(D)** Pupae ppkGAL4>UAS-CD8::GFP, UAS-Dicer2 and UAS-Milton RNAi,

1016

and **(E)** those expressing Miro shows defects in pruning with a robust block in severing and

1017

clearance of dendrites. ddaC neurons expressing RNAi against Marf **(F)** and Opa-like 1 **(G)**

1018

in neurons with ppkGAL4>UAS CD8::GFP and UAS Dicer2 show a block in dendrite

1019

severing and clearance. **(H)** Disruption of mitochondrial fission from expressing an RNAi

1020

against Drp1 in **(H)** or by overexpression of wild type Drp1 **(I)**. Neurons expressing

1021 ppkGAL4 UAS CD8::GFP and UAS Dicer2 show disruptions in dendrite remodelling. (J)

1022 Chart with data from these categorised in three phenotypic groups as in Fig. 4, n numbers

1023 indicated at the top.

1024

1025

1026

1027

1028

1029

1030

1031

1032

1033

1034

1035

1036

1037

1038

1039

1040

1041

1042

1043

1044

1045

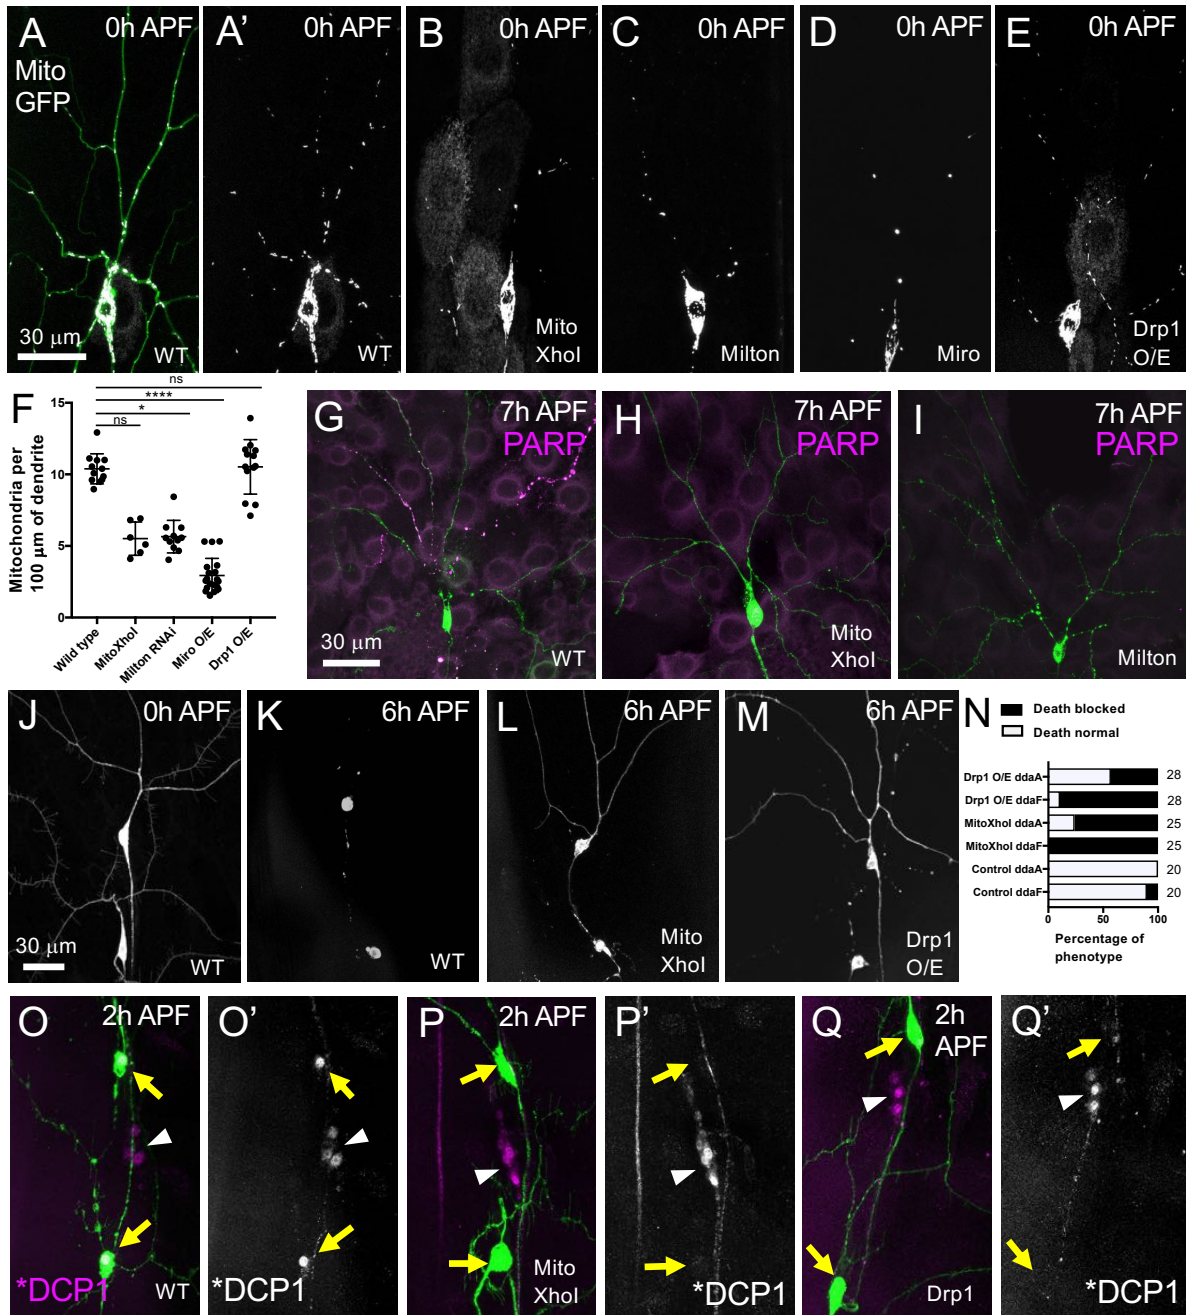

1046

1047 **Figure 6: Dysregulating mitochondrial function, transport and fission/fusion changes**

1048 **the distribution of mitochondria and caspase activation in pruning and dying da**

1049 **neurons.**

1050 (A - F) Pre-pupal neurons expressing ppkGAL4 UAS-Mito::GFP and different UAS-

1051 RNAis to perturb mitochondrial function, transport and fission. (A) Left panel showing a

1052 wild-type ddaC neuron expressing ppkCD4td Tomato (green) and ppkGAL4 UAS-

1053 Mito::GFP(grey), showing the distribution of mitochondria in the dendrites. (A') shows the

1054 distribution of mitochondria (grey) in the dendrites, without the membrane marker. In pre-  
1055 pupae expressing ppkGAL4 UAS-Mito::GFP, disruption of mitochondrial function by  
1056 expression of MitoXhoI (**B**) and transport with Milton RNAi (**C**), or overexpression of Miro  
1057 (**D**) decreases the number of mitochondria present in the dendrites. (**E**) In pre-pupae  
1058 overexpression of Drp1 does not show a significant effect on the number of mitochondria in  
1059 the dendrites. (**F**) Chart plotting the number of mitochondria per 100µm of dendrite length in  
1060 genotypes shown in A. Values are reported as mean ± standard deviation and p values are  
1061 reported as \* for p < 0.05 and \*\* for p < 0.01. (**G - I**) Disruption of mitochondrial function  
1062 and transport disrupts caspase activation in the dendrites. Wild type pre-pupae neurons  
1063 expressing ppkGAL4 UAS-CD8::PARP::Venus show active cleaved-PARP in their  
1064 dendrites. (**G**) The disruption of mitochondrial function by expression of MitoXhoI (**H**) or  
1065 mitochondrial transport by knockdown of Milton (**I**) in ddaC neurons block caspase  
1066 activation in the dendrites. (**J - N**) The disruption of mitochondrial function and fission  
1067 blocks cell death in Class III neurons. (**J**) Wild type ddaF and ddaA neurons labelled using  
1068 19-12 GAL4 UAS-CD8::GFP undergo normal cell death by 6h APF (**K**). Upon disruption of  
1069 mitochondrial function using MitoXhoI (**L**) and mitochondrial fission by overexpression of  
1070 Drp1 (**M**) cell death is blocked in both ddaF and ddaA neurons labelled using 19-12 GAL4  
1071 UAS-CD8::GFP. The block in cell death at 6h APF is quantified and represented graphically  
1072 (**N**). ddaF and ddaA neurons labelled using 19-12 GAL4 UAS-CD8::GFP, fixed and stained  
1073 against GFP (green) and active DCP-1 (magenta, left panels or grey, right panels) show  
1074 strong nuclear staining of DCP-1 (**O O'**) in wild type neurons at 2h APF. This active DCP-1  
1075 staining is lost when mitochondrial function is disrupted (**P P'**) or when mitochondrial fission  
1076 gene Drp1 is overexpressed (**Q Q'**).

1077

1078

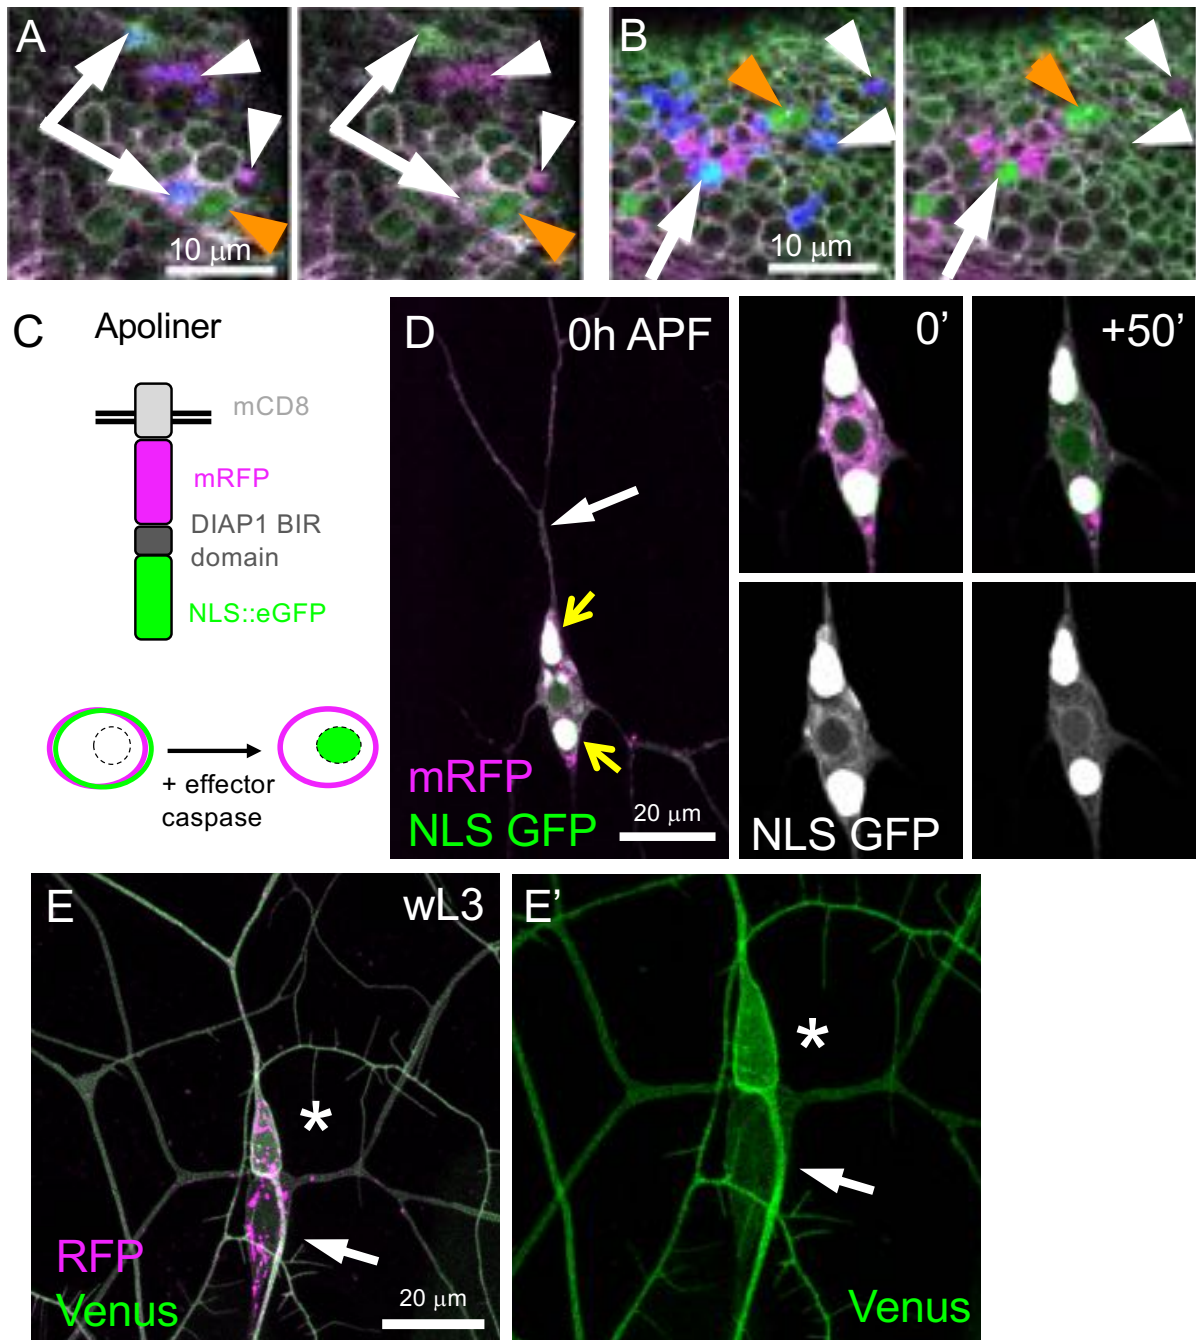

1079

1080 **Supplemental Figure 1: (A)** Wing discs of Control females and **(B)** wing discs of *hs-hid*  
 1081 males exposed to 1h heat-shock at 37°C reveal cells at successive stages of cell death.  
 1082 SR4VH reporter expression (magenta = RFP; green = Venus) together with immunolabelling  
 1083 for the cleaved effector caspase Dcp-1 (blue) orange arrowheads = nuclear Venus without  
 1084 cleaved Dcp-1 (early-stage); white arrows = both nuclear Venus and cleaved Dcp-1 (mid-  
 1085 stage); and white arrowheads = pyknotic cells/dead cell membranes with RFP and cleaved

1086 Dcp-1 (late-stage); Scale bars = 10  $\mu$ m. (C) Schematic representation of genetically encoded  
1087 Apoliner probe and its mechanism of action. (D) Left panel shows a prepupa with ddaC  
1088 expressing UAS-Apoliner. Sensory neurons showed large accumulations of the probe within  
1089 the Golgi (yellow arrows). The first and last time points from a movie showing a single slice  
1090 through the middle of the soma and the weak accumulation of GFP (green, top panel and grey  
1091 scale, bottom panel) in the nuclear region. The dendrites are still attached to the cell body (D,  
1092 white arrow), suggesting weak active caspases in ddaC. (E) 2x ppkGAL4 expressing UAS-  
1093 SR4VH in wandering third instar larva (wL3) Some RFP accumulates in vesicles but the  
1094 membranes of both class III and class IV neurons are evenly labelled. No nuclear GFP is  
1095 found in any of these sensory neurons during this period. (E') Shows Venus channel. The  
1096 image is magnified to focus on the cell bodies.

1097

1098

1099

1100

1101

1102

1103

1104

1105

1106

1107

1108

1109



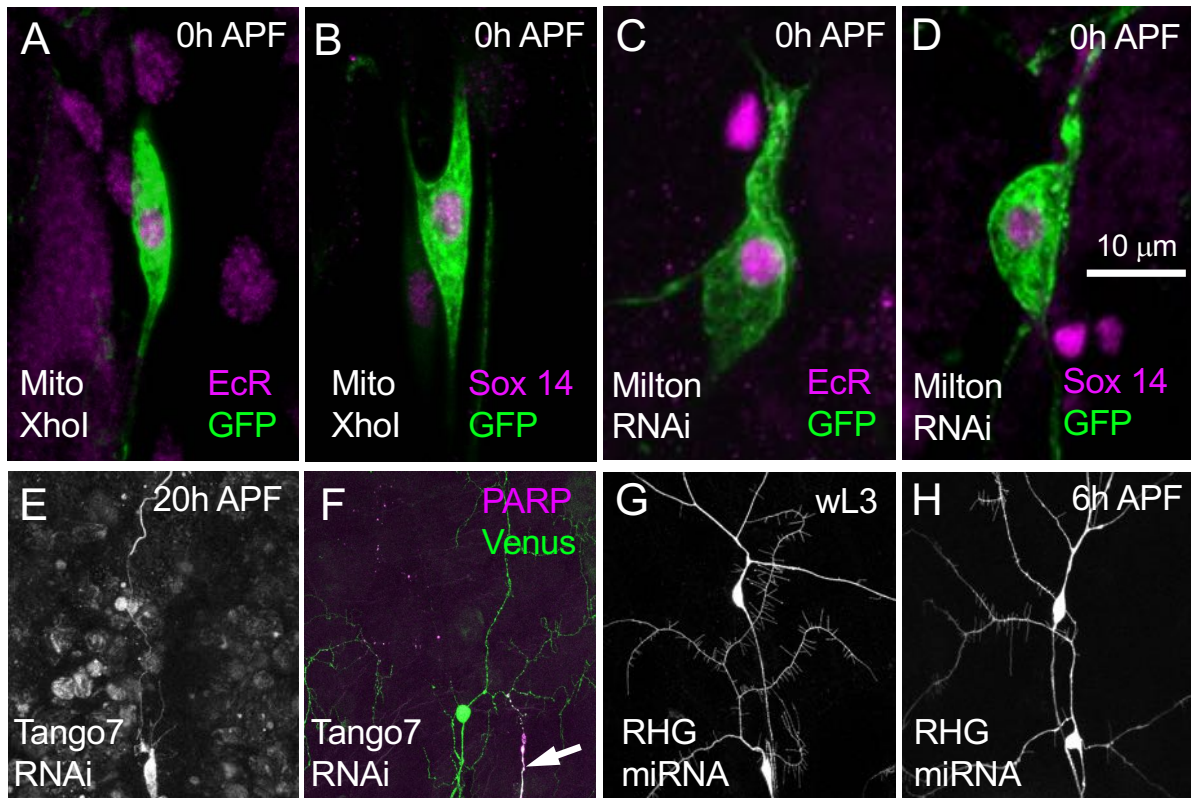

1110

1111

**Supplemental Figure 2: (A,B)** Pre-Pupae expressing MitoXhol in ppkGAL4 UAS

1112

CD8::GFP neurons fixed and stained for EcR (A, magenta) and GFP (green) or Sox14 (B,

1113

magenta) and GFP (green). These show normal expression of both hormonally gated

1114

transcription factors. (C ,D) Pre-Pupae expressing Milton RNAi in ppkGAL4 UAS-

1115

CD8::GFP neurons fixed and stained for EcR (C, magenta) and GFP (green) or Sox14 (D,

1116

magenta) and GFP (green). (E) ddaC neurons labelled with ppkGAL4 UAS CD8::GFP at 20h

1117

APF showing pruning defects when Tango7 is knocked down using UAS-Tango7 RNAi (F)

1118

A 7h APF pre-pupae expressing ppkGAL4 UAS CD8::PARP::Venus and UAS Tango7

1119

RNAi. This was immunostained against anti-GFP (green) and anti-PARP (magenta) and

1120

showed detectable levels of cleaved PARP (arrows) within the dendrites of the ddaC neurons.

1121

**(G,H).** The disruption of RHG proteins in Class III neurons. (G) ddaF and ddaA neurons

1122

expressing RHG-RNAi in in 3<sup>rd</sup> instar expressing in larva look normal. (H) ddaF and ddaA

1123

neurons expressing RHG-RNAi do not show signs of apoptosis at 6h APF.

1124

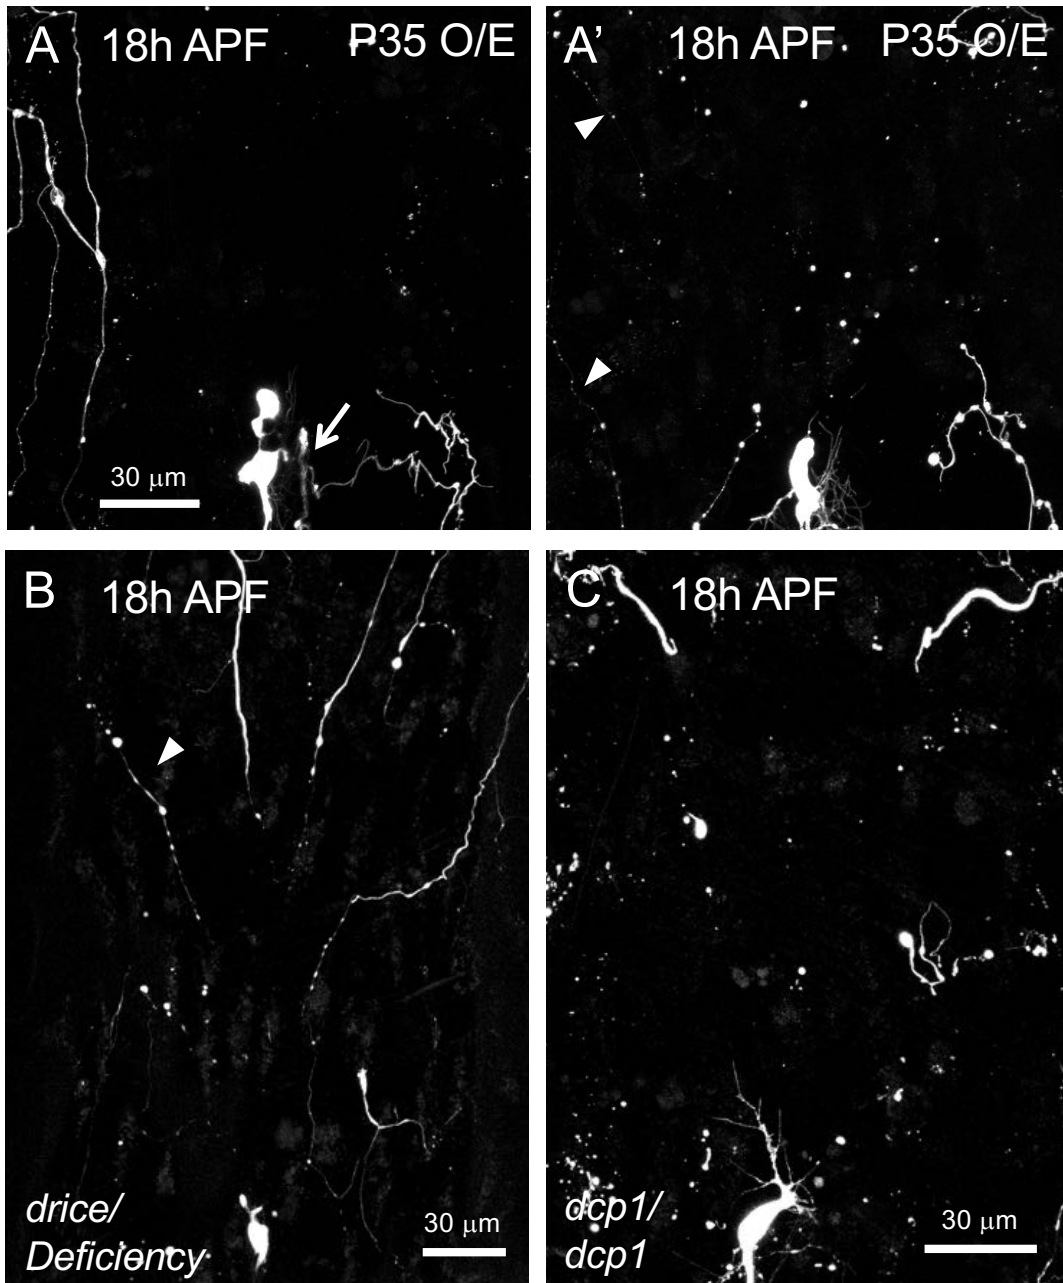

1125

1126 **Supplemental Figure 3:**

1127 (A-A') ddaC neurons labelled using *ppkGAL4>UAS-CD8::GFP, UAS-p35* at 18h APF  
 1128 expressing two copies of the baculovirus protein P35. These show pruning defects ranging  
 1129 from **severing (A, arrow)** to clearance defects (A', **arrowheads**). (B) ddaC neurons labelled  
 1130 using *ppk-eGFP* showing clearance defects in Drice mutant over Drice deficiency at 18h  
 1131 APF. (C) ddaC neurons labelled using *ppkeGFP* showing clearance defects in DCP-1  
 1132 homozygous mutants at 18h APF.

1133 **Supplementary Movie 1: Time-lapse of dorsal multiple dendrite neuron (dmd1)**  
1134 **expressing SR4VH reporter in prepupa.** Time-lapse movie of dmd1 neuron (arrow) in a  
1135 prepupa, 2h after puparium formation. Sensory neurons expressing SR4VH reporter under the  
1136 control of *elav*<sup>C155</sup> GAL4 imaged every 10 minutes. GFP leaves the membrane and  
1137 accumulates in the nucleus over the time course revealing caspase activation. Other sensory  
1138 neurons in close proximity already showing robust caspase activation.

1139

1140 **Supplementary Movie 2: Time-lapse movie of a class IV da neuron ddaC and class III**  
1141 **da neuron ddaA expressing SR4VH reporter in prepupa.** Time-lapse movie of a ddaC  
1142 neuron (magenta arrow) and a ddaA neuron (green arrow) starting at white prepupa (0h  
1143 APF), imaged every 5 minutes. Sensory neurons expressing SR4VH reporter under the  
1144 control of two copies of *ppk*-GAL4. Timelapse reveals caspase activation by the  
1145 accumulation of GFP in the nucleus of ddaC (pruning, class IV da neuron) and a robust  
1146 accumulation of GFP in the nucleus of ddaA neuron (dying, class III da neuron) over the time  
1147 course.

1148
